# Supplementary material for: Access to rheumatologists among patients with newly diagnosed rheumatoid arthritis in a Canadian universal public healthcare system
Source: PubMed Central journal article supplement — BMJ Open. 2014 Jan 30;4(1):e003888. doi: 10.1136/bmjopen-2013-003888 (PMC3913026; doi:10.1136/bmjopen-2013-003888), 2014-01-30
Supplement: bmjopen-2013-003888.draft_revisions.pdf [file bmjopen-2013-003888.draft_revisions.pdf]

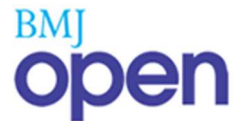

**Access to rheumatologists among patients with newly diagnosed rheumatoid arthritis in a Canadian universal public health care system**

|                                 |                                                                                                                                                                                                                                                                                                                                                                                                                                                                                                                                                                                                                                                                     |
|---------------------------------|---------------------------------------------------------------------------------------------------------------------------------------------------------------------------------------------------------------------------------------------------------------------------------------------------------------------------------------------------------------------------------------------------------------------------------------------------------------------------------------------------------------------------------------------------------------------------------------------------------------------------------------------------------------------|
| Journal:                        | <i>BMJ Open</i>                                                                                                                                                                                                                                                                                                                                                                                                                                                                                                                                                                                                                                                     |
| Manuscript ID:                  | bmjopen-2013-003888                                                                                                                                                                                                                                                                                                                                                                                                                                                                                                                                                                                                                                                 |
| Article Type:                   | Research                                                                                                                                                                                                                                                                                                                                                                                                                                                                                                                                                                                                                                                            |
| Date Submitted by the Author:   | 09-Sep-2013                                                                                                                                                                                                                                                                                                                                                                                                                                                                                                                                                                                                                                                         |
| Complete List of Authors:       | Widdifield, Jessica; University of Toronto, Paterson, J. Michael; Institute for Clinical Evaluative Sciences, Bernatsky, Sasha; Research Institute of the McGill University Health Centre, Division of Clinical Epidemiology<br>Tu, Karen; Institute for Clinical Evaluative Sciences, Thorne, J Carter; Southlake Regional Health Centre, Ivers, Noah; Women's College Hospital, Toronto<br>Butt, Debra; University of Toronto, Jaakkimainen, R. Liisa; Institute for Clinical Evaluative Sciences, Gunraj, Nadia; Institute for Clinical Evaluative Sciences, Ahluwalia, Vandana; William Osler Health Center, Bombardier, Claire; Institute for Work and Health, |
| <b>Primary Subject Heading</b>: | Rheumatology                                                                                                                                                                                                                                                                                                                                                                                                                                                                                                                                                                                                                                                        |
| Secondary Subject Heading:      | General practice / Family practice, Health services research                                                                                                                                                                                                                                                                                                                                                                                                                                                                                                                                                                                                        |
| Keywords:                       | RHEUMATOLOGY, Quality in health care < HEALTH SERVICES ADMINISTRATION & MANAGEMENT, Rheumatology < INTERNAL MEDICINE                                                                                                                                                                                                                                                                                                                                                                                                                                                                                                                                                |
|                                 |                                                                                                                                                                                                                                                                                                                                                                                                                                                                                                                                                                                                                                                                     |

## TITLE PAGE

**TITLE: Access to rheumatologists among patients with newly diagnosed rheumatoid arthritis in a Canadian universal public health care system.**

**Jessica Widdifield**<sup>1,2</sup> BSc, PhD; **J. Michael Paterson**<sup>1,2,3</sup> MSc; **Sasha Bernatsky**<sup>4</sup> MD, FRCPC, PhD; **Karen Tu**<sup>1,2</sup> MD, MSc; **J. Carter Thorne**<sup>5</sup> MD, FRCPC, **Noah Ivers**<sup>1,2,6</sup> MD, PhD(c), **Debra Butt**<sup>1</sup>, MD, MSc; **R. Liisa Jaakkimainen**<sup>1,2</sup> MD, MSc, **Nadia Gunraj**<sup>2</sup> BSc, MPH; **Vandana Ahluwalia**<sup>7</sup> MD, FRCPC, **Claire Bombardier**<sup>1</sup>, MD, MSc, FRCPC.

**Affiliations:**

1. *University of Toronto, Toronto, ON;*
2. *Institute for Clinical Evaluative Sciences, Toronto, ON;*
3. *McMaster University, Hamilton, ON;*
4. *McGill University, Montreal, QC;*
5. *Southlake Regional Health Centre, Newmarket, ON;*
6. *Women's College Hospital, ON;*
7. *William Osler Health Center, Brampton, ON;*

**Correspondence to:**

Jessica Widdifield

200 Elizabeth St 13EN-224 Toronto ON M5G 2C4 CANADA

Tel: 416-340-4856 / Fax: 416-340-4814 / E-mail: [jessica.widdifield@utoronto.ca](mailto:jessica.widdifield@utoronto.ca)**Abstract word count:** 247**Manuscript word count:** 2568 (excluding abstract)**No. of Pages:** 20**No. of Figures:** 2**No. of Tables:** 3**Key words:** Rheumatoid arthritis, quality of care, access to care

**ABSTRACT**

Our objective was to estimate the percent of incident rheumatoid arthritis (RA) patients who saw a rheumatologist within 3, 6 and 12 months of suspected diagnosis by a family physician, and assess what factors may influence the time frame with which patients are seen.

**Methods:**

Over 2000-2009, we studied incident RA patients who were initially diagnosed by a family physician. We assessed secular trends in rheumatology encounters and differences between patients who saw vs. did not see a rheumatologist. We performed hierarchical logistic regression analyses to determine whether receipt of rheumatology care was associated with patient, primary care physician, and geographic factors.

**Results:**

Among 19,760 incident RA patients, 59%, 75% and 84% of patients saw a rheumatologist within 3, 6 and 12 months, respectively. The prevalence of initial consultations within 3 months did not increase overtime, however, access within 6 and 12 months increased overtime. Factors positively associated with timely consultations included higher regional rheumatology supply [adjusted Odds Ratio, aOR 1.35(95% CI 1.13,1.60)] and higher socioeconomic status [aOR 1.18(95%CI 1.07,1.30)]. Conversely, factors inversely associated with timely consultations included remote patient residence [aOR 0.51(95% CI 0.41,0.64)], and male family physicians [aOR 0.88(95% CI 0.81,0.95)].

**Conclusion:**

Increasing access to rheumatologists within 6 and 12 months occurred overtime, however consultations within 3 months did not change overtime. Measures of poor access (such as proximity to and density of rheumatologists) were negatively associated with timely consultations. Additional factors that contributed to disparities in access included patient socioeconomic status and physician sex.

**N=247**

**Article focus:**

- In a large population-based cohort of patients with newly diagnosed rheumatoid arthritis (RA) in Canada, our study's aim was to determine the percent of incident RA patients who saw a rheumatologist within 3, 6 and 12 months of suspected diagnosis by a family physician, and assessed what factors may influence the time frame with which patients are seen.

**Key messages:**

- We found increasing access to rheumatologists within 6 and 12 months have occurred overtime, however consultations within 3 months did not change overtime.
- Overall, 41% of patients are still not seen within 3 months of a primary care diagnosis as recommended by current guidelines. Thus, an important proportion of patients are not receiving optimal care. However, we only studied a proportion of the total delay from the onset of the patients' symptoms to rheumatology care. It is unknown how long patients have symptoms before seeking medical care, or remain in primary care before their RA is recognized. Therefore the delays between onset of symptoms to rheumatology care may be larger than reported here.
- Measures of poor access (such as proximity to and density of rheumatologists) were negatively associated with timely consultations. Additional factors that contributed to disparities in access included patient socioeconomic status and physician sex. Strategies to facilitate more timely access, such as improving proximity to and density of rheumatologists along with family physician education on initiating more timely referrals, are acutely needed.

**Strengths and limitations of this study:**

- Strengths of our study include its large sample and the use of a validated population-based RA cohort.
- Our main limitation is that our cohort definition requires patients whose family physician strongly suspects that the patient has RA, thus, our analyses are likely restricted to patients with a more homogeneous clinical presentation (such as rheumatoid factor positive patients) or those with more active disease.

1  
2 Rheumatoid arthritis (RA) is a progressive inflammatory arthritis associated with joint damage and  
3 functional deterioration, work disability and premature mortality.[1] At disease onset, RA is considered  
4 an urgent medical condition[1,2] requiring prompt referral to a rheumatologist.[3-5] Timely  
5 rheumatology care is important as it increases early exposure to treatment,[6] improves patient  
6 outcomes,[7][8] decreases the need for costly surgical interventions,[9] and thus reduces the global  
7 disease burden. Furthermore, the sooner a patient is seen and managed by rheumatologists results in  
8 superior clinical responses and increases the chance of disease remission[10][11][12][13][14] than if  
9 the same care is administered later in the disease course.[15]  
10  
11  
12  
13  
14  
15  
16  
17  
18  
19  
20  
21  
22

23 In Canada, access to specialists often depends on referral by a family physician. For optimal RA care  
24 to occur, a patient must seek care by a family physician, who, in turn, must suspect RA and initiate  
25 referral to a rheumatologist, who will undertake the appropriate diagnostic tests and initiate early  
26 treatment.[16] Delays that occur at any of these stages prevent patients from receiving timely care.  
27  
28  
29  
30  
31  
32  
33  
34

35 Ontario has approximately 13 million residents and 10,000 family physicians.[17] There are  
36 approximately 150 rheumatologists (1.5 rheumatologists per 100,000 population), however, they are  
37 concentrated most heavily in southern Ontario,[18] which may be a potential barrier to equitable,  
38 timely rheumatology care.[19] Accordingly, we set out to determine the percent of incident RA patients  
39 who saw a rheumatologist within 3, 6 and 12 months of suspected diagnosis by a family physician, and  
40 assessed what factors may influence the time frame with which patients are seen.  
41  
42  
43  
44  
45  
46  
47  
48  
49  
50  
51

## 52 **SUBJECTS AND METHODS:**

53  
54 **Setting and Design.** We performed a retrospective, population-based study of newly diagnosed RA  
55 patients within Ontario, in which all residents are covered by universal public health insurance for  
56  
57  
58  
59  
60

1  
2 physician and hospital services. The study was approved by the Research Ethics Board at Sunnybrook  
3  
4 Health Sciences Centre, Toronto, Canada.  
5  
6  
7  
8

9 **Data sources.** We used the Ontario Rheumatoid Arthritis administrative Database (ORAD), a  
10 population-based RA cohort generated from administrative databases using a validated case definition.  
11 RA patients are included in ORAD if they have 3 Ontario Health Insurance (OHIP) physician service  
12 claims over a two-year period in which RA is the recorded diagnosis, with at least 1 of these claims  
13 made by a musculoskeletal specialist. ORAD has been validated and shown to have a high sensitivity  
14 (78%), specificity (100%), and positive predictive value (78%) for identifying RA patients based on  
15 medical record reviews.[20][21] Validation of RA onset within administrative data has also shown to  
16 be highly accurate.[21] Records for individuals in ORAD are also linked to the following  
17 administrative datasets. The Ontario Registered Persons Database was used to identify demographic  
18 information on age, sex, place of residence, death, and emigration. Physician specialty was obtained by  
19 linking the Institute for Clinical Evaluative Sciences Physician Database with the OHIP database.[22]  
20 We used the Client Agency Program Enrolment Database to identify the primary care delivery model  
21 of the family physician at the time the patient entered the cohort. These datasets are linked in an  
22 anonymous fashion using encrypted health insurance numbers for residents and encrypted license  
23 numbers for physicians, and they have very little missing information.[23]  
24  
25  
26  
27  
28  
29  
30  
31  
32  
33  
34  
35  
36  
37  
38  
39  
40  
41  
42  
43  
44  
45  
46

47 **Cohort definition.** We identified all incident RA patients from April 1, 2000 to March 31, 2010.  
48 Analyses were restricted to patients whose initial RA diagnosis codes were assigned by a family  
49 physician in an outpatient setting. Cohort entry (suspected RA diagnosis date) was the date of the first  
50 RA diagnosis code, and patients were followed up until one year or until outmigration, death, or the  
51 end of study period.  
52  
53  
54  
55  
56  
57  
58  
59  
60

1  
2 **Covariate information.** Covariates for patient demographics included age, sex, socioeconomic status  
3 (SES), and year of suspected diagnosis. SES was defined as the patient's neighbourhood median  
4 household income quintile from the Statistics Canada Census. We also identified whether patients were  
5 subsequently admitted to hospital with an RA diagnosis following a primary care diagnosis, as patients  
6 who are seen in a hospital setting for their RA may have poorer access to health care providers and/or  
7 more severe disease. As a measure of co-morbidity, we used the Johns Hopkins Adjusted Diagnostic  
8 Groups (ADG) Case-Mix System derived from both outpatient and inpatient data in the two years  
9 preceding cohort entry.[24] We categorized ADGs into low (<5), moderate (5-9), and high co-  
10 morbidity (10+). We chose this risk adjustment method as patients using the most health care resources  
11 are not typically those with single diseases but rather those with multiple and sometimes unrelated  
12 conditions. This clustering of morbidity can be a better predictor of health care use than the presence of  
13 specific diseases.[25] Geographic characteristics included patient residence, regional health service  
14 planning areas (Local Health Integration Networks, LHINs[26]), rheumatology supply and distance to  
15 the closest rheumatologist. Rurality was based upon each patient's postal code and a community  
16 population size of less than 10,000. Rheumatology supply was defined as the number of  
17 rheumatologists per 100,000 adults in the planning area (LHIN) of patient residence, and distance to  
18 the closest rheumatologist was the linear distance from the centre of patient's postal code area to that of  
19 the closest rheumatologist, with 'remote residence' defined as 100 or more kilometers (km) to the  
20 nearest rheumatologist. Family physician characteristics included sex, years since graduation (as a  
21 proxy for experience), and type of primary care delivery model the family physician was working in at  
22 the time of patient's cohort entry. We categorized each practice type as (1) *blended capitation models*  
23 [Family Health Networks (FHNs), Family Health Organizations (FHOs), Family Health Teams  
24 (FHTs)], and (2) *enhanced fee-for-service models* (Family Health Groups or FHGs) and other groups  
25 and *traditional fee-for-service practitioners*. [27] The main difference between the models is how  
26 physicians are reimbursed (e.g., through age-and-sex-adjusted capitation payments versus being paid  
27  
28  
29  
30  
31  
32  
33  
34  
35  
36  
37  
38  
39  
40  
41  
42  
43  
44  
45  
46  
47  
48  
49  
50  
51  
52  
53  
54  
55  
56  
57  
58  
59  
60

1  
2 on a per visit basis). Capitation models often include interdisciplinary teams involving allied healthcare  
3  
4 providers and require physicians to maintain a list or 'roster' of enrolled patients to whom they are  
5  
6 committed to providing primary care.[28] Including primary care model type enabled us to explore if  
7  
8 there was an effect regarding different primary care practice models and/or how the physicians are paid  
9  
10 as a facilitator to timely rheumatology care.  
11  
12

13  
14  
15  
16 **Outcome Measurements.** We followed incident patients, determining whether they had a visit to a  
17  
18 rheumatologist at three, six and 12 months.  
19  
20

21  
22  
23 **Statistical analysis.** Descriptive statistics were used to characterize the study population. We assessed  
24  
25 secular trends (as the percentage of each annual incident RA cohort who saw a rheumatologist within  
26  
27 each time period) and differences among patients who received vs. did not receive rheumatology care.  
28  
29 We performed hierarchical logistic regression analyses to determine whether receipt of rheumatology  
30  
31 care was associated with patient demographics, co-morbidity, geographic characteristics, and family  
32  
33 physician characteristics. Crude and adjusted odds ratio (aOR) estimates with 95% confidence  
34  
35 intervals (CIs) were generated. Separate analyses were performed for each outcome end date  
36  
37 (benchmarks): three, six and 12 months.  
38  
39  
40  
41  
42  
43  
44

45 All analyses were performed at the ICES on anonymized data using SAS version 9.2 (SAS Institute,  
46  
47 Cary, North Carolina).  
48  
49  
50

## 51 **RESULTS:**

52  
53  
54 Between 2000 and 2009, we identified 19,670 incident RA patients (figure 1). Overall, the mean  
55  
56 (standard deviation, SD) age at time of cohort entry was 54 (16) years, 71% were female, 16% resided  
57  
58 in rural areas and 5% resided in areas remote ( $\geq 100$  km) from the nearest rheumatologist (table 1).  
59  
60



1  
2 Most patients were seen by male family physicians (70%). Few (5%) physicians were practicing under  
3  
4 a newer capitation model.  
5  
6

7  
8  
9 Over one year of follow-up, the average time from the first RA diagnosis code to first rheumatologist  
10 visit was 77 days (table 1). Overall, 59%, 75% and 84% of patients saw a rheumatologist within 3, 6  
11 and 12 months, respectively. The prevalence of initial rheumatology encounters within 3 months did  
12 not increase over the study period. However, the percentage of patients who saw a rheumatologist  
13 within 6 and 12 months increased gradually overtime, from 72% and 81% in 2000 to 81% and 89% in  
14 2009, respectively (figure 2).  
15  
16  
17  
18  
19  
20  
21  
22  
23  
24

25  
26 Table 2 compares the characteristics of patients who saw vs. did not see a rheumatologist within 3  
27 months of cohort entry. More patients who were not seen by a rheumatologist lived in a rural area (19%  
28 vs 14%) and remote areas.  
29  
30  
31  
32  
33  
34

35 Independent determinants of receiving rheumatology care within 3 months of RA diagnosis are  
36 reported in Table 2. Factors associated with prompt rheumatology care included increasing  
37 rheumatology supply [aOR 1.35 (95% CI 1.13,1.60)] and higher SES [aOR 1.18 (95% CI 1.07,1.30)].  
38  
39 The strongest independent factor negatively associated with lower frequency of rheumatology visits  
40 was for patients who lived at remote distances to rheumatologists [aOR 0.51 (95% CI 0.41,0.64)]. The  
41 likelihood of not having prompt rheumatology consultations was also reduced for patients of male  
42 family physicians [aOR 0.87 (95% CI 0.81,0.95)]. There was no calendar-year effect illustrating an  
43 increasing likelihood of seeing a rheumatologist within 3 months overtime. However, improvements  
44 overtime were demonstrated for patients being seen by a rheumatologist within 6 and 12 months (table  
45  
46  
47  
48  
49  
50  
51  
52  
53  
54  
55  
56  
57  
58  
59  
60

1  
2 We observed similar associations when we studied the effects of factors on the odds of receiving  
3 rheumatology care within 6 and 12 months (table 3). The effect of proximity on access became stronger  
4 as the time to rheumatology visit was lengthened: 6 months, aOR 0.56 (95% CI 0.36,0.59); 12 months,  
5 aOR 0.33 (95% CI 0.26,0.43). Patients who were hospitalized for RA subsequent to an initial  
6 diagnosis in an outpatient primary care setting were almost half as likely to been seen by a  
7 rheumatologist at 6 and 12 months.  
8  
9  
10  
11  
12  
13  
14  
15  
16  
17  
18

## 19 Discussion

20  
21  
22 In a publicly-funded universal healthcare system, we studied trends in encounters with rheumatologists  
23 over the past decade and observed increasing rates of access to rheumatologists within 6 months and 12  
24 months after diagnosis by a family physician. However, no such improvements were observed among  
25 patients seen within 3 months, a more favorable benchmark. We also explored whether receipt of  
26 rheumatology care was associated with patient and family physician characteristics, and measures of  
27 rheumatology supply. We found that patients of higher SES were more likely to receive timely  
28 rheumatology care, which has also been demonstrated in other Canadian provinces.[29]:[30] Further,  
29 proximity to and density of rheumatologists were important determinants of timely rheumatology care.  
30  
31  
32  
33  
34  
35  
36  
37  
38  
39  
40  
41  
42  
43

44 While our results appear encouraging, 41% of patients are still not seen within 3 months of a primary  
45 care diagnosis as recommended by current guidelines. Thus, an important proportion of patients are  
46 not receiving optimal care. When interpreting the results it is important to recognize that the delay in  
47 rheumatology consultation being studied represents only a proportion of the total delay from the onset  
48 of the patients' symptoms. It is unknown how long patients have symptoms before seeking medical  
49 care, or remain in primary care before their RA is recognized. Therefore the delays between onset of  
50 symptoms to rheumatology care may be larger than reported here.  
51  
52  
53  
54  
55  
56  
57  
58  
59  
60

1  
2  
3  
4 Given the high economic impact of RA[31], rheumatologists are key to an integrated healthcare  
5 delivery system.[32] However, not all patients are receiving the right care at the right time. Delays in  
6  
7 timely consultations may reflect the growing burden of RA relative to rheumatology supply. During  
8  
9 our study period, the number of rheumatologists in Ontario remained relatively stable (1.5  
10  
11 rheumatologists per 100,000 population).[18] While most RA patients were seen by a rheumatologist  
12  
13 within 1 year, delays in more timely benchmarks may also be indicative of the need to educate primary  
14  
15 care physicians to initiate rheumatology referrals sooner. Ultimately, delays in access to timely, quality  
16  
17 care and treatment result in increasing disability for RA patients as well as increasing costs to the  
18  
19 healthcare system.[31]  
20  
21  
22  
23  
24  
25  
26  
27

28 Geographic variation in receipt of timely rheumatology care may be indicative of problems with  
29  
30 access. Considering the geographic size and features of Ontario, approximately one-quarter of  
31  
32 Ontarians resides in communities with 30,000 or fewer residents.[33] However, few rheumatologists  
33  
34 practice in rural communities.[18] Consequently, the threshold for referral to rheumatologists may be  
35  
36 higher in remote versus urban communities (i.e., rural patients who are referred have substantially more  
37  
38 active disease than their urban counterparts).[6][34] Thus, there is a need to address the low  
39  
40 rheumatology supply among remote communities.  
41  
42  
43  
44  
45  
46

47 Additionally, there was a low likelihood of being seen by a rheumatologist within 6 or 12 months  
48  
49 subsequent to a hospital encounter for RA after a patient was initially diagnosed in a primary care  
50  
51 setting. In areas with few rheumatologists, family physicians may have no choice but to encourage  
52  
53 patients to seek hospital-based specialty care. In addition, while most rheumatologists have a hospital  
54  
55 appointment, not all hospitals have rheumatologists.[35] Thus, our findings reinforce the need for  
56  
57 strategies to not only improve access to rheumatologists but also to encourage proper follow-up for  
58  
59  
60

1  
2 these patients.  
3  
4  
5

6  
7 Our results showed that patients of female family physicians were more likely to receive rheumatology  
8  
9 care earlier. While there is conflicting data on the influence of physician gender on practice  
10  
11 styles,[36]:[37] female physicians have been shown to engage in more preventive services and to  
12  
13 communicate differently with their patients.[38] Male physicians may have more confidence in  
14  
15 managing RA in primary care, such as starting glucocorticoids prior to rheumatology encounters.  
16  
17 Similarly, patients have also reported to have more confidence in male physicians[39] and thus may be  
18  
19 more hesitant to seek secondary care. Together, this may explain why RA patients of female family  
20  
21 physicians are more likely to be seen by rheumatologists earlier and that the influence of physician  
22  
23 gender was attenuated at 1-year post-RA diagnosis.  
24  
25  
26  
27  
28  
29

30 We also sought to evaluate the influence of primary care models on rheumatology encounters. We  
31  
32 hypothesized that patients of capitation models, which involve interdisciplinary teams, allied health  
33  
34 providers and where patient enrollment is most strongly encouraged, could improve continuity of care  
35  
36 with their patients that could ultimately affect the quality of care that these patients receive. While we  
37  
38 found no association, it may be too soon to determine an effect as many physicians changed models  
39  
40 overtime and few physicians were practicing under a capitation model during the study period.[40]  
41  
42  
43  
44  
45  
46

47 Strengths of our study include its large sample and the use of a validated population-based RA  
48  
49 cohort.[21] Our main limitation is that our cohort definition requires patients to have had their first RA  
50  
51 diagnosis code provided by a family physician (i.e. those whose physician strongly suspects that the  
52  
53 patient has RA). While others have used this approach,[9] our analyses are likely restricted to patients  
54  
55 with a more homogeneous clinical presentation (such as rheumatoid factor positive patients) or those  
56  
57 with more active disease in which the family physician was able to accurately diagnose the condition  
58  
59  
60

1  
2 and/or more likely to use an RA billing code as a reason for visit. Therefore we may be over-estimating  
3  
4 the proportion of patients with timely rheumatology encounters. These related caveats are owing to the  
5  
6 absence of both symptom onset and date of referral in administrative databases. Future research is  
7  
8 required to develop and validate algorithms to better predict RA onset from administrative data.  
9  
10 However, previous researchers have also used physician service claims to sample RA patients from  
11  
12 rheumatology practices in order to calculate wait times on a smaller scale, and these studies may be  
13  
14 subjected to similar biases (inclusion of early RA patients with a more homogenous clinical  
15  
16 presentation).[41][42]  
17  
18  
19  
20  
21  
22

23 In conclusion, we found increasing access to rheumatologists within 6 and 12 months overtime,  
24  
25 however rheumatology encounters within 3 months did not change overtime. Measures of poor access  
26  
27 negatively impacted rates of encounters with a rheumatologist. Factors that contributed to disparities in  
28  
29 rheumatology access included SES and physician sex. Strategies to facilitate more timely access, such  
30  
31 as improving proximity to and density of rheumatologists along with family physician education on  
32  
33 initiating more timely referrals, are acutely needed.  
34  
35  
36  
37  
38  
39  
40  
41  
42  
43  
44  
45  
46  
47  
48  
49  
50  
51  
52  
53  
54  
55  
56  
57  
58  
59  
60

**Acknowledgements:**

Financial support provided by the Canadian Institutes of Health Research (CIHR operating grant 119348). This study was also supported by the Institute for Clinical Evaluative Sciences (ICES), a non-profit research corporation funded by the Ontario Ministry of Health and Long-Term Care (MOHLTC). The opinions, results and conclusions are those of the authors and are independent from the funding sources. No endorsement by ICES or the Ontario MOHLTC is intended or should be inferred.

This study was performed in the context on the Ontario Best Practices Research Initiative (OBRI), a unique collaboration of rheumatologists, primary care physicians, researchers, patients and other stakeholders seeking to improve the quality of care and clinical outcomes of patients with arthritis across the spectrum of care.

Dr. Tu holds a CIHR Fellowship Award in Primary Care Research (2011-2013). Dr. Ivers holds a CIHR Fellowship Award in Clinical Research and a Fellowship Award from the Department of Family and Community Medicine, University of Toronto. Dr. Bombardier holds a Canada Research Chair in Knowledge Transfer for Musculoskeletal Care (2002-2016) and a Pfizer Research Chair in Rheumatology.

**Contributorship**

All authors contributed substantially to conception and design, or acquisition of data, or analysis and interpretation of data and were involved in drafting the article and gave final approval of the version to be published.

**Data sharing**

There are no additional unpublished data other than that presented in the manuscript. Questions regarding the data presented in the manuscript can be directed to the corresponding author.

**Competing Interests**

None

Figure 1. Flow diagram of selection of study participants

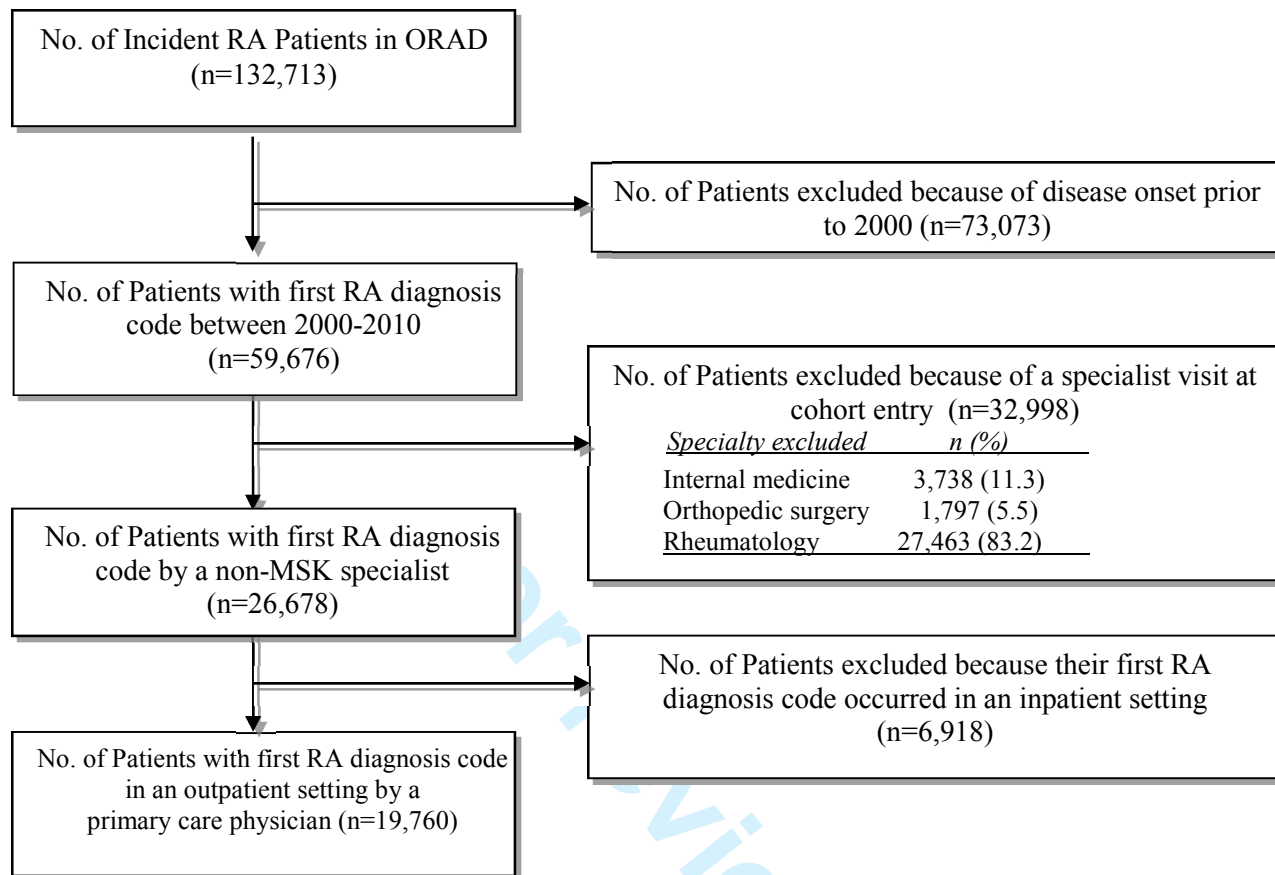

Figure 2: Percentage of patients with newly diagnosed RA who are seen by a rheumatologist within 3, 6 and 12 months of suspected diagnosis by a primary care physician.

1  
2  
3  
4  
5  
6  
7  
8  
9  
10  
11  
12  
13  
14  
15  
16  
17  
18  
19  
20  
21  
22  
23  
24  
25  
26  
27  
28  
29  
30  
31  
32  
33  
34  
35  
36  
37  
38  
39  
40  
41  
42  
43  
44  
45  
46  
47  
48  
49  
50  
51  
52  
53  
54  
55  
56  
57  
58  
59  
60

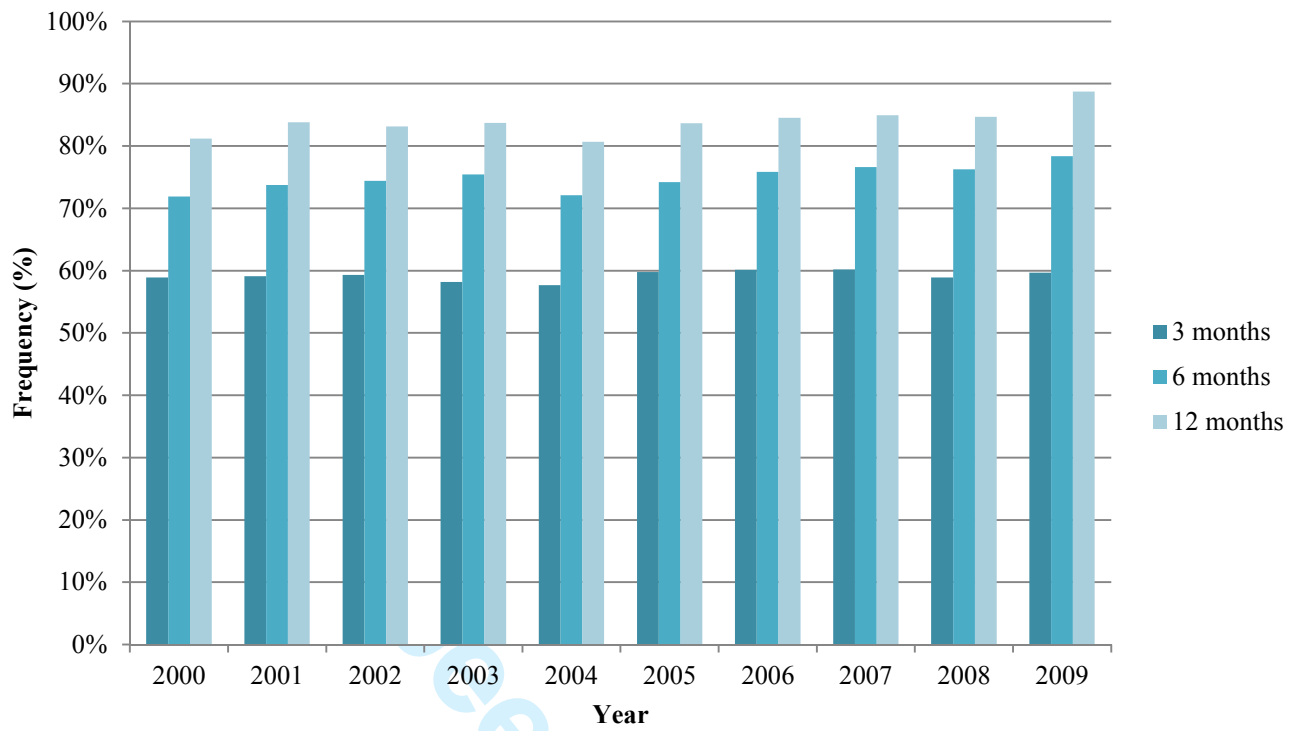

**Table 1: Selected cohort characteristics of 19,670 newly diagnosed RA patients that met our criteria**

| Characteristic | Newly diagnosed |
|----------------|-----------------|
|----------------|-----------------|



|                                                                                                                                                                                                                                                                                                       | <b>RA<br/>n=19,670</b> |
|-------------------------------------------------------------------------------------------------------------------------------------------------------------------------------------------------------------------------------------------------------------------------------------------------------|------------------------|
| <b>Patient Demographics</b>                                                                                                                                                                                                                                                                           |                        |
| Age at cohort entry, mean (SD)                                                                                                                                                                                                                                                                        | 53.7 (16.3)            |
| Female, n (%)                                                                                                                                                                                                                                                                                         | 14,091 (71.1)          |
| Rural residence, n (%)                                                                                                                                                                                                                                                                                | 3,196 (16.2)           |
| <b>Patient Co-morbidity</b>                                                                                                                                                                                                                                                                           |                        |
| Number of Hopkins ADGs* in the 2 years prior to entry, n (%)                                                                                                                                                                                                                                          |                        |
| < 5                                                                                                                                                                                                                                                                                                   | 5,229 (26.5)           |
| 5-9                                                                                                                                                                                                                                                                                                   | 9,790 (49.5)           |
| 10+                                                                                                                                                                                                                                                                                                   | 4,741 (24.0)           |
| <b>Rheumatology Access Measures</b>                                                                                                                                                                                                                                                                   |                        |
| Time (days) from first diagnosis code to first rheumatologist visit, mean (SD)                                                                                                                                                                                                                        | 76.7 (76.9)            |
| Time (days) from first diagnosis code to first rheumatologist visit, median (IQR)                                                                                                                                                                                                                     | 50 (22-104)            |
| Rheumatology supply per 100 000 adults†, mean (SD)                                                                                                                                                                                                                                                    | 1.5 (1.1)              |
| Distance to closest rheumatologist                                                                                                                                                                                                                                                                    |                        |
| Kilometers, mean (SD)                                                                                                                                                                                                                                                                                 | 24.2 (69.7)            |
| Remote (≥100 km), n (%)                                                                                                                                                                                                                                                                               | 1,047 (5.3)            |
| <b>Primary care physician characteristics</b>                                                                                                                                                                                                                                                         |                        |
| Male, n (%)                                                                                                                                                                                                                                                                                           | 13,872 (70.2)          |
| Years since graduation, mean (SD)                                                                                                                                                                                                                                                                     | 24.5 (10.5)            |
| Practice type, n (%)                                                                                                                                                                                                                                                                                  |                        |
| Blended capitation models†† (FHO / FHN)                                                                                                                                                                                                                                                               | 976 (4.9)              |
| Traditional fee-for-service and enhanced fee-for-service (FHG/Other)                                                                                                                                                                                                                                  | 18,784 (95.1)          |
| * Ambulatory diagnostic groups                                                                                                                                                                                                                                                                        |                        |
| †in patient Local Health Integration Networks, LHINs (regional health service planning areas)                                                                                                                                                                                                         |                        |
| ††Practice types: <i>blended capitation models</i> [Family Health Networks (FHNs), Family Health Organizations (FHOs), Family Health Teams (FHTs), an interprofessional team model composed of FHNs and FHOs], <i>enhanced fee-for-service models</i> [Family Health Groups (FHGs) and other groups], |                        |

**Table 2: Descriptive characteristics for RA patients that do and do not receive rheumatology care and influence of various factors on receipt of rheumatology care within THREE months of suspected diagnosis by a primary care physician**

| Characteristic                                                                               | Seen by a rheumatologist |               | Multivariate analysis   |                          |
|----------------------------------------------------------------------------------------------|--------------------------|---------------|-------------------------|--------------------------|
|                                                                                              | Yes<br>n=11,694          | No<br>N=8,066 | Crude OR*<br>[95% CI]** | Adjusted† OR<br>[95% CI] |
| <b>Demographics</b>                                                                          |                          |               |                         |                          |
| Age, mean (SD)                                                                               | 53.8 (15.9)              | 53.6 (16.7)   | 1.00 [1.00, 1.00]       | 1.00 [1.00, 1.00]        |
| Male sex, n (%) [REF=Female]                                                                 | 3,341 (28.6)             | 2,328 (28.9)  | 1.01 [0.95, 1.07]       | 1.04 [0.97, 1.11]        |
| Income quintile, n(%) [REF = 1 – low]                                                        | 59 (0.5)                 | 50 (0.6)      | REF                     | REF                      |
| 2                                                                                            | 2,197 (18.8)             | 1,693 (21)    | 1.10 [1.00, 1.20]       | 1.08 [0.98, 1.18]        |
| 3                                                                                            | 2,359 (20.2)             | 1,657 (20.5)  | 1.12 [1.03, 1.23]       | 1.11 [1.01, 1.22]        |
| 4                                                                                            | 2,407 (20.6)             | 1,627 (20.2)  | 1.12 [1.02, 1.23]       | 1.09 [0.99, 1.20]        |
| 5                                                                                            | 2,305 (19.7)             | 1,581 (19.6)  | 1.22 [1.11, 1.34]       | 1.18 [1.07, 1.30]        |
| Calendar Year of Cohort Entry [REF=2000]                                                     |                          |               |                         |                          |
| 2000                                                                                         | 1,110                    | 774           | REF                     | REF                      |
| 2001                                                                                         | 1,110                    | 768           | 0.99 [0.87, 1.13]       | 0.99 [0.87, 1.14]        |
| 2002                                                                                         | 1,074                    | 736           | 1.00 [0.87, 1.14]       | 1.00 [0.87, 1.15]        |
| 2003                                                                                         | 1,154                    | 830           | 0.96 [0.85, 1.10]       | 0.99 [0.87, 1.13]        |
| 2004                                                                                         | 1,187                    | 872           | 0.94 [0.83, 1.08]       | 0.99 [0.87, 1.14]        |
| 2005                                                                                         | 1,231                    | 828           | 1.05 [0.92, 1.20]       | 1.12 [0.98, 1.28]        |
| 2006                                                                                         | 1,179                    | 782           | 1.07 [0.94, 1.22]       | 1.13 [0.98, 1.29]        |
| 2007                                                                                         | 1,237                    | 818           | 1.07 [0.94, 1.23]       | 1.14 [0.99, 1.31]        |
| 2008                                                                                         | 1,268                    | 885           | 1.01 [0.89, 1.16]       | 1.10 [0.96, 1.26]        |
| 2009                                                                                         | 1,144                    | 773           | 1.03 [0.90, 1.18]       | 1.10 [0.95, 1.27]        |
| <b>Co-morbidity: Number of Hopkins ADGs in the 2 years prior to entry, n (%) (REF=&lt;5)</b> |                          |               |                         |                          |
| < 5                                                                                          | 3,031 (25.9)             | 2,198 (27.3)  | REF                     | REF                      |
| 5-9                                                                                          | 5,802 (49.6)             | 3,988 (49.4)  | 1.04 [0.97, 1.12]       | 1.04 [0.97, 1.12]        |
| 10+                                                                                          | 2,861 (24.5)             | 1,880 (23.3)  | 1.08 [0.99, 1.18]       | 1.07 [0.98, 1.17]        |
| Hospitalization for RA prior to rheumatologist visit / end of study period, n(%)             | 71 (0.6)                 | 41 (0.5)      | 1.24 [0.84, 1.84]       | 1.34 [0.89, 2.02]        |
| <b>Geographic</b>                                                                            |                          |               |                         |                          |
| Patient Rural residence, n(%) [REF=urban]                                                    | 1,636 (14.0)             | 1,560 (19.3)  | 0.70 [0.64, 0.76]       | 0.92 [0.83, 1.01]        |
| Rheumatology supply per 100 000 adults, mean (SD)                                            | 1.6 (1.1)                | 1.4 (1.0)     | 1.16 [1.12, 1.19]       | 1.35 [1.13, 1.60]        |
| Distance to rheumatologist (km), mean (SD)                                                   | 17.8 (64.24)             | 33.6 (75.89)  | n/a                     | n/a                      |
| Remote Distance (≥100 km to rheumatologist), n(%)                                            | 312 (2.7)                | 735 (9.1)     | 0.29 [0.25, 0.34]       | 0.51 [0.41, 0.64]        |
| <b>Primary Care physician</b>                                                                |                          |               |                         |                          |
| Male sex, n (%) (REF=Female)                                                                 | 8,069 (69.0)             | 5,803 (71.9)  | 0.83 [0.77, 0.89]       | 0.87 [0.81, 0.95]        |
| Years since graduation, mean (SD)                                                            | 24.3 (10.48)             | 24.6 (10.53)  | 1.00 [0.99, 1.00]       | 1.00 [0.99, 1.00]        |
| Practice type††, n (%) (REF=fee-for-service)                                                 |                          |               |                         |                          |
| Traditional and Enhanced fee-for-service                                                     | 11,085 (94.8)            | 7,699 (95.5)  | REF                     | REF                      |
| Blended capitation models                                                                    | 609 (5.2)                | 367 (4.5)     | 1.14 [0.98, 1.32]       | 1.15 [0.99, 1.34]        |

\*OR = Odds Ratio; \*\*95% CI = 95% confidence interval

†Adjusted for all covariates including: patient demographics, clinical factors, primary care physician characteristics, provider continuity, and geographic characteristics [including regional variation by regional health service planning areas Local Health Integration Networks (LHINs) not reported here.]

††Practice types: *blended capitation models* [Family Health Networks (FHNs), Family Health Organizations (FHOs), Family Health Teams (FHTs), an interprofessional team model composed of FHNs and FHOs], *enhanced fee-for-service models* [Family Health Groups (FHGs) and other groups], and *solo fee-for-service practitioners* (those who did not belong to a model).

**Table 3: Influence of patient demographics, co-morbidity, geographic characteristics, and primary care physician characteristics on receipt of rheumatology care within 6 and 12 months**

| Characteristic                                                                                                                                                                                                                                                                                                                                                                                                                                                                                                                                                                                                                                                                                                      | 6 months                |                          | 12 months            |                          |
|---------------------------------------------------------------------------------------------------------------------------------------------------------------------------------------------------------------------------------------------------------------------------------------------------------------------------------------------------------------------------------------------------------------------------------------------------------------------------------------------------------------------------------------------------------------------------------------------------------------------------------------------------------------------------------------------------------------------|-------------------------|--------------------------|----------------------|--------------------------|
|                                                                                                                                                                                                                                                                                                                                                                                                                                                                                                                                                                                                                                                                                                                     | Crude OR*<br>[95% CI]** | Adjusted† OR<br>[95% CI] | Crude OR<br>[95% CI] | Adjusted OR<br>[95% CI]  |
| <b>Demographics</b>                                                                                                                                                                                                                                                                                                                                                                                                                                                                                                                                                                                                                                                                                                 |                         |                          |                      |                          |
| Age, mean (± SD)                                                                                                                                                                                                                                                                                                                                                                                                                                                                                                                                                                                                                                                                                                    | 1.00 [1.00, 1.00]       | 1.00 [1.00, 1.00]        | 1.00 [1.00, 1.00]    | 1.00 [1.00, 1.00]        |
| Male sex [REF=Female]                                                                                                                                                                                                                                                                                                                                                                                                                                                                                                                                                                                                                                                                                               | 0.97 [0.90, 1.04]       | 0.98 [0.91, 1.06]        | 0.92 [0.85, 1.00]    | 0.94 [0.86, 1.02]        |
| Income quintile [REF = 1 – low]                                                                                                                                                                                                                                                                                                                                                                                                                                                                                                                                                                                                                                                                                     | REF                     | REF                      | REF                  | REF                      |
| 2                                                                                                                                                                                                                                                                                                                                                                                                                                                                                                                                                                                                                                                                                                                   | 1.15 [1.04, 1.27]       | 1.14 [1.03, 1.26]        | 1.07 [0.96, 1.21]    | 1.06 [0.94, 1.20]        |
| 3                                                                                                                                                                                                                                                                                                                                                                                                                                                                                                                                                                                                                                                                                                                   | 1.22 [1.10, 1.35]       | 1.20 [1.08, 1.33]        | 1.17 [1.04, 1.32]    | <b>1.16 [1.03, 1.31]</b> |
| 4                                                                                                                                                                                                                                                                                                                                                                                                                                                                                                                                                                                                                                                                                                                   | 1.15 [1.04, 1.27]       | 1.11 [1.00, 1.24]        | 1.15 [1.02, 1.30]    | 1.12 [0.99, 1.27]        |
| 5                                                                                                                                                                                                                                                                                                                                                                                                                                                                                                                                                                                                                                                                                                                   | 1.30 [1.17, 1.44]       | 1.26 [1.13, 1.40]        | 1.35 [1.19, 1.53]    | <b>1.31 [1.15, 1.49]</b> |
| Calendar Year of Cohort Entry<br>[REF=2000]                                                                                                                                                                                                                                                                                                                                                                                                                                                                                                                                                                                                                                                                         | REF                     | REF                      | REF                  | REF                      |
| 2001                                                                                                                                                                                                                                                                                                                                                                                                                                                                                                                                                                                                                                                                                                                | 1.07 [0.92, 1.23]       | 1.07 [0.92, 1.24]        | 1.13 [0.96, 1.34]    | 1.13 [0.95, 1.35]        |
| 2002                                                                                                                                                                                                                                                                                                                                                                                                                                                                                                                                                                                                                                                                                                                | 1.12 [0.97, 1.30]       | 1.12 [0.96, 1.31]        | 1.12 [0.95, 1.33]    | 1.14 [0.95, 1.36]        |
| 2003                                                                                                                                                                                                                                                                                                                                                                                                                                                                                                                                                                                                                                                                                                                | 1.19 [1.02, 1.38]       | 1.22 [1.04, 1.42]        | 1.18 [0.99, 1.40]    | 1.21 [1.01, 1.44]        |
| 2004                                                                                                                                                                                                                                                                                                                                                                                                                                                                                                                                                                                                                                                                                                                | 1.01 [0.87, 1.17]       | 1.04 [0.89, 1.21]        | 0.97 [0.82, 1.15]    | 1.01 [0.84, 1.20]        |
| 2005                                                                                                                                                                                                                                                                                                                                                                                                                                                                                                                                                                                                                                                                                                                | 1.15 [1.00, 1.34]       | 1.21 [1.04, 1.41]        | 1.22 [1.02, 1.45]    | 1.30 [1.08, 1.56]        |
| 2006                                                                                                                                                                                                                                                                                                                                                                                                                                                                                                                                                                                                                                                                                                                | 1.25 [1.07, 1.45]       | 1.30 [1.11, 1.52]        | 1.28 [1.07, 1.53]    | 1.33 [1.10, 1.60]        |
| 2007                                                                                                                                                                                                                                                                                                                                                                                                                                                                                                                                                                                                                                                                                                                | 1.29 [1.11, 1.50]       | 1.37 [1.17, 1.60]        | 1.33 [1.11, 1.59]    | 1.42 [1.18, 1.72]        |
| 2008                                                                                                                                                                                                                                                                                                                                                                                                                                                                                                                                                                                                                                                                                                                | 1.26 [1.09, 1.47]       | 1.35 [1.16, 1.58]        | 1.30 [1.09, 1.55]    | 1.41 [1.17, 1.70]        |
| 2009                                                                                                                                                                                                                                                                                                                                                                                                                                                                                                                                                                                                                                                                                                                | 1.42 [1.21, 1.66]       | 1.49 [1.26, 1.76]        | 1.83 [1.51, 2.22]    | 1.96 [1.60, 2.40]        |
| <b>Co-morbidity</b>                                                                                                                                                                                                                                                                                                                                                                                                                                                                                                                                                                                                                                                                                                 |                         |                          |                      |                          |
| No. of Hopkins ADGs[REF=<5]                                                                                                                                                                                                                                                                                                                                                                                                                                                                                                                                                                                                                                                                                         | REF                     | REF                      | REF                  | REF                      |
| 5-9                                                                                                                                                                                                                                                                                                                                                                                                                                                                                                                                                                                                                                                                                                                 | 1.02 [0.94, 1.10]       | 1.03 [0.95, 1.12]        | 1.03 [0.94, 1.13]    | 1.07 [0.97, 1.18]        |
| 10+                                                                                                                                                                                                                                                                                                                                                                                                                                                                                                                                                                                                                                                                                                                 | 1.02 [0.93, 1.12]       | 1.05 [0.95, 1.16]        | 1.04 [0.93, 1.16]    | 1.09 [0.97, 1.23]        |
| Hospitalization for RA prior to<br>rheumatologist visit / end of<br>study period                                                                                                                                                                                                                                                                                                                                                                                                                                                                                                                                                                                                                                    | 0.60 [0.42, 0.85]       | 0.63 [0.44, 0.91]        | 0.51 [0.36, 0.71]    | 0.54 [0.38, 0.76]        |
| <b>Geographic</b>                                                                                                                                                                                                                                                                                                                                                                                                                                                                                                                                                                                                                                                                                                   |                         |                          |                      |                          |
| Patient rural residence<br>[REF=urban]                                                                                                                                                                                                                                                                                                                                                                                                                                                                                                                                                                                                                                                                              | 0.74 [0.68, 0.81]       | 1.00 [0.89, 1.11]        | 0.80 [0.72, 0.89]    | 1.09 [0.96, 1.24]        |
| Rheumatology supply per 100<br>000 adults                                                                                                                                                                                                                                                                                                                                                                                                                                                                                                                                                                                                                                                                           | 1.15 [1.11, 1.20]       | 1.19 [0.97, 1.45]        | 1.16 [1.11, 1.22]    | 1.25 [0.98, 1.61]        |
| Remote Distance (≥100 km to<br>rheumatologist)                                                                                                                                                                                                                                                                                                                                                                                                                                                                                                                                                                                                                                                                      | 0.28 [0.24, 0.33]       | 0.46 [0.36, 0.59]        | 0.26 [0.22, 0.31]    | 0.33 [0.26, 0.43]        |
| <b>Primary Care physician</b>                                                                                                                                                                                                                                                                                                                                                                                                                                                                                                                                                                                                                                                                                       |                         |                          |                      |                          |
| Male sex [REF=Female]                                                                                                                                                                                                                                                                                                                                                                                                                                                                                                                                                                                                                                                                                               | 0.81 [0.74, 0.89]       | 0.89 [0.81, 0.97]        | 0.81 [0.73, 0.90]    | 0.91 [0.81, 1.01]        |
| Years since graduation                                                                                                                                                                                                                                                                                                                                                                                                                                                                                                                                                                                                                                                                                              | 1.00 [0.99, 1.00]       | 0.99 [0.99, 1.00]        | 1.00 [0.99, 1.00]    | 0.99 [0.99, 1.00]        |
| Practice type††<br>[REF=fee-for-service]                                                                                                                                                                                                                                                                                                                                                                                                                                                                                                                                                                                                                                                                            |                         |                          |                      |                          |
| Capitation model                                                                                                                                                                                                                                                                                                                                                                                                                                                                                                                                                                                                                                                                                                    | 1.22 [1.01, 1.47]       | 1.13 [0.93, 1.36]        | 1.22 [0.99, 1.51]    | 1.09 [0.87, 1.35]        |
| *OR = Odds Ratio; **95% CI = 95% confidence interval †Adjusted for all covariates including: patient demographics, clinical factors, primary care physician characteristics, provider continuity, and geographic characteristics [including regional variation by regional health service planning areas Local Health Integration Networks (LHINs) not reported here.] ††Practice types: <i>blended capitation models</i> [Family Health Networks (FHNs), Family Health Organizations (FHOs), Family Health Teams (FHTs), an interprofessional team model composed of FHNs and FHOs], <i>enhanced fee-for-service models</i> [Family Health Groups (FHGs) and other groups], and traditional <i>fee-for-service</i> |                         |                          |                      |                          |

## REFERENCES

1. Pincus T. Rheumatoid arthritis: a medical emergency? *Scand J Rheumatol Suppl* 1994;**100**:21-30
2. Moreland LW, Bridges SL, Jr. Early rheumatoid arthritis: a medical emergency? *Am J Med* 2001;**111**(6):498-500 doi: S0002-9343(01)00973-1 [pii][published Online First: Epub Date]].
3. Emery P, Breedveld FC, Dougados M, et al. Early referral recommendation for newly diagnosed rheumatoid arthritis: evidence based development of a clinical guide. *Ann Rheum Dis* 2002;**61**(4):290-7
4. Combe B, Landewe R, Lukas C, et al. EULAR recommendations for the management of early arthritis: report of a task force of the European Standing Committee for International Clinical Studies Including Therapeutics (ESCISIT). *Ann Rheum Dis* 2007;**66**(1):34-45 doi: ard.2005.044354 [pii] 10.1136/ard.2005.044354[published Online First: Epub Date]].
5. Bykerk V, et al. Canadian Consensus Statement on Early Optimal Therapy in Early Rheumatoid Arthritis. *The Journal of the Canadian Rheumatology Association* 2004
6. Widdifield J, Bernatsky S, Paterson JM, et al. Quality care in seniors with new-onset rheumatoid arthritis: a Canadian perspective. *Arthritis Care Res (Hoboken)* 2011;**63**(1):53-7 doi: 10.1002/acr.20304[published Online First: Epub Date]].
7. Nell VP, Machold KP, Eberl G, et al. Benefit of very early referral and very early therapy with disease-modifying anti-rheumatic drugs in patients with early rheumatoid arthritis. *Rheumatology (Oxford)* 2004;**43**(7):906-14 doi: 10.1093/rheumatology/keh199 keh199 [pii][published Online First: Epub Date]].
8. Kyburz D, Gabay C, Michel BA, et al. The long-term impact of early treatment of rheumatoid arthritis on radiographic progression: a population-based cohort study. *Rheumatology (Oxford)* 2011;**50**(6):1106-10 doi: keq424 [pii] 10.1093/rheumatology/keq424[published Online First: Epub Date]].
9. Feldman DE, Bernatsky S, Houde M, et al. Early consultation with a rheumatologist for RA: does it reduce subsequent use of orthopaedic surgery? *Rheumatology (Oxford)* 2012 doi: kes231 [pii] 10.1093/rheumatology/kes231[published Online First: Epub Date]].
10. van Nies JA, Krabben A, Schoones JW, et al. What is the evidence for the presence of a therapeutic window of opportunity in rheumatoid arthritis? A systematic literature review. *Ann Rheum Dis* 2013 doi: annrheumdis-2012-203130 [pii] 10.1136/annrheumdis-2012-203130[published Online First: Epub Date]].
11. Mierau M, Schoels M, Gonda G, et al. Assessing remission in clinical practice. *Rheumatology (Oxford)* 2007;**46**:975-9
12. Emery P, Breedveld F, Hall S, et al. Comparison of methotrexate monotherapy with a combination of methotrexate and etanercept in active, early, moderate to severe rheumatoid arthritis (COMET): a randomised, double-blind, parallel treatment trial. *Lancet* 2008;**372**:375-82.
13. Emery P, Salmon M. Early rheumatoid arthritis: time to aim for remission? *Ann Rheum Dis* 1995;**54**:944-7
14. Sokka T, Hetland M, Mäkinen H, et al. Remission and rheumatoid arthritis: Data on patients receiving usual care in twenty-four countries. *Arthritis Rheum* 2008;**58**:2642-51
15. Boers M. Understanding the window of opportunity concept in early rheumatoid arthritis. *Arthritis Rheum* 2003;**48**(7):1771-4 doi: 10.1002/art.11156[published Online First: Epub Date]].

16. Li LC, Badley EM, MacKay C, et al. An evidence-informed, integrated framework for rheumatoid arthritis care. *Arthritis Rheum* 2008;**59**(8):1171-83 doi: 10.1002/art.23931[published Online First: Epub Date]].
17. Kralj B, Kantarevic J. Primary Care in Ontario: reforms, investments and achievements. Ontario Medical Review Available online:  
<https://www.oma.org/Resources/Documents/PrimaryCareFeaturepdf> 2012
18. Widdifield J, Paterson JM, Bernatsky S, et al. Epidemiology of Rheumatoid Arthritis in a universal public health care system [abstract]. *Ann Rheum Dis* 2013;**Suppl**
19. Tepper J, Schultz S, Rothwell D, et al. Physician services in rural and Northern Ontario. . ICES investigative report. Toronto (ON): Institute for Clinical Evaluative Sciences, 2005.
20. Widdifield J, Bombardier C, Bernatsky S, et al. Accuracy of Canadian Health Administrative Databases for identifying Patients with Rheumatoid Arthritis: A validation study using the Medical Records of Primary Care Physicians. 2012 ACR Annual Scientific Meeting [Abstract #926]. *Arthritis Care and Research* 2012
21. Widdifield J, Bernatsky S, Paterson J, et al. Accuracy of Canadian Health Administrative Databases in Identifying Patients with Rheumatoid Arthritis: A validation study using the Medical Records of Rheumatologists. *Arthritis Care and Research* [in press] 2013
22. Chan B, Schultz S. Supply and utilization of general practitioner and family physician services in Ontario. Toronto, ON: Institute for Clinical Evaluative Sciences, 2005.
23. Improving health care data in Ontario. ICES Investigative Report. Toronto: Institute for Clinical Evaluative Sciences, 2005.
24. The Johns Hopkins Adjusted Clinical Group (ACG) Case-Mix System.  
Available at: <http://acg.jhsph.edu>. Secondary The Johns Hopkins Adjusted Clinical Group (ACG) Case-Mix System.  
Available at: <http://acg.jhsph.edu>.
25. Starfield B. Primary Care: Balancing Health Needs, Services and Technology. New York: Oxford University Press, 1998:35–54.
26. Ministry of Health and Long-Term Care M. Local Health Integration Networks. Secondary Local Health Integration Networks 2006. <http://www.lhins.on.ca/>.
27. Ministry of Health and Long-Term Care M. Health Force Ontario: Family Practice Models. Secondary Health Force Ontario: Family Practice Models 2013.  
[http://www.healthforceontario.ca/en/Home/Physicians/Training\\_%7C\\_Practising\\_in\\_Ontario/Physician\\_Roles/Family\\_Practice\\_Models](http://www.healthforceontario.ca/en/Home/Physicians/Training_%7C_Practising_in_Ontario/Physician_Roles/Family_Practice_Models).
28. Glazier R, Zagorski B, Rayner J. Comparison of Primary Care Models in Ontario by Demographics, Case Mix and Emergency Department Use, 2008/09 to 2009/10. . ICES Investigative Report Toronto: Institute for Clinical Evaluative Sciences, 2012.
29. Lacaille D, Anis A, Guh D, et al. Gaps in care for rheumatoid arthritis: a population study. *Arthritis Rheum* 2005;**53**(2):241-8
30. Feldman DE, Bernatsky S, Haggerty J, et al. Delay in consultation with specialists for persons with suspected new-onset rheumatoid arthritis: a population-based study. *Arthritis Rheum* 2007;**57**(8):1419-25 doi: 10.1002/art.23086[published Online First: Epub Date]].
31. Bombardier C, Hawker G, Mosher D, et al. The Impact of Arthritis in Canada: Today and Over the Next 30 Years. Arthritis Alliance of Canada, 2011.
32. Gabriel S, Wagner J, Zinsmeister A, et al. Is rheumatoid arthritis care more costly when provided by rheumatologists compared with generalists? *Arthritis Rheum* 2001;**44**(7):1504-14
33. Glazier R, Gozdyra P, Yeritsyan N. Geographic Access to Primary Care and Hospital Services for Rural and Northern Communities. Toronto, Ontario: Institute for Clinical Evaluative Sciences, 2011.



- 1  
2 34. Hawker G, Badley E, Jaglal S, et al. Project for an Ontario Women's Health Evidence-Based  
3 Report: Musculoskeletal Conditions. In: Bierman A, ed. Toronto, 2010.
- 4 35. Badley E, Veinot P, Ansari H, et al. Arthritis Community Research and Evaluation Unit 2007  
5 survey of rheumatologists in Ontario. <http://www.acreu.ca/pdf/pub5/08-03.pdf>. 2008
- 6 36. Meeuwesen L, Schapp C, Van der Staak C. Verbal analysis of doctor-patient communication. *Soc*  
7 *Sci Med* 1991;**32**(1143)
- 8 37. Bensing JM, van den Brink-Muinen A, de Bakker DH. Gender differences in practice style: a Dutch  
9 study of general practitioners. *Med Care* 1993;**31**(3):219-29
- 10 38. Bertakis K, Helms L, Callahan E, et al. The influence of gender on physician practice style. *Med*  
11 *Care* 1995;**33**:407-16
- 12 39. Hall JA, Blanch-Hartigan D, Roter DL. Patients' satisfaction with male versus female physicians: a  
13 meta-analysis. *Med Care* 2011;**49**(7):611-7 doi: 10.1097/MLR.0b013e318213c03f[published  
14 Online First: Epub Date]].
- 15 40. Jaakkimainen RL, Barnsley J, Klein-Geltink J, et al. Did changing primary care delivery models  
16 change performance? A population based study using health administrative data. *BMC Fam*  
17 *Pract* 2011;**12**:44 doi: 1471-2296-12-44 [pii]  
18 10.1186/1471-2296-12-44[published Online First: Epub Date]].
- 19 41. Jamal S, Alibhai SM, Badley EM, et al. Time to treatment for new patients with rheumatoid  
20 arthritis in a major metropolitan city. *J Rheumatol* 2011;**38**(7):1282-8 doi: jrheum.101315 [pii]  
21 10.3899/jrheum.101315[published Online First: Epub Date]].
- 22 42. Tavares R, Pope JE, Tremblay JL, et al. Time to Disease-modifying Antirheumatic Drug Treatment  
23 in Rheumatoid Arthritis and Its Predictors: A National, Multicenter, Retrospective Cohort. *J*  
24 *Rheumatol* 2012 doi: jrheum.120100 [pii]  
25 10.3899/jrheum.120100[published Online First: Epub Date]].
- 26  
27  
28  
29  
30  
31  
32  
33  
34  
35  
36  
37  
38  
39  
40  
41  
42  
43  
44  
45  
46  
47  
48  
49  
50  
51  
52  
53  
54  
55  
56  
57  
58  
59  
60

STROBE Statement—Checklist of items that should be included in reports of *cohort studies*

|                          | Item No | Recommendation                                                                                                                                                                                                |
|--------------------------|---------|---------------------------------------------------------------------------------------------------------------------------------------------------------------------------------------------------------------|
| Title and abstract       | 1       | ✓(a) Indicate the study's design with a commonly used term in the title or the abstract                                                                                                                       |
|                          |         | ✓(b) Provide in the abstract an informative and balanced summary of what was done and what was found                                                                                                          |
| <b>Introduction</b>      |         |                                                                                                                                                                                                               |
| Background/rationale     | 2       | ✓ Explain the scientific background and rationale for the investigation being reported                                                                                                                        |
| Objectives               | 3       | ✓ State specific objectives, including any prespecified hypotheses                                                                                                                                            |
| <b>Methods</b>           |         |                                                                                                                                                                                                               |
| Study design             | 4       | ✓ Present key elements of study design early in the paper                                                                                                                                                     |
| Setting                  | 5       | ✓ Describe the setting, locations, and relevant dates, including periods of recruitment, exposure, follow-up, and data collection                                                                             |
| Participants             | 6       | ✓(a) Give the eligibility criteria, and the sources and methods of selection of participants. Describe methods of follow-up                                                                                   |
|                          |         | (b) For matched studies, give matching criteria and number of exposed and unexposed                                                                                                                           |
| Variables                | 7       | ✓ Clearly define all outcomes, exposures, predictors, potential confounders, and effect modifiers. Give diagnostic criteria, if applicable                                                                    |
| Data sources/measurement | 8*      | ✓ For each variable of interest, give sources of data and details of methods of assessment (measurement). Describe comparability of assessment methods if there is more than one group                        |
| Bias                     | 9       | ✓ Describe any efforts to address potential sources of bias                                                                                                                                                   |
| Study size               | 10      | Explain how the study size was arrived at <i>n/a – population-based study</i>                                                                                                                                 |
| Quantitative variables   | 11      | ✓ Explain how quantitative variables were handled in the analyses. If applicable, describe which groupings were chosen and why                                                                                |
| Statistical methods      | 12      | ✓(a) Describe all statistical methods, including those used to control for confounding                                                                                                                        |
|                          |         | ✓(b) Describe any methods used to examine subgroups and interactions                                                                                                                                          |
|                          |         | (c) Explain how missing data were addressed                                                                                                                                                                   |
|                          |         | ✓(d) If applicable, explain how loss to follow-up was addressed                                                                                                                                               |
|                          |         | ✓(e) Describe any sensitivity analyses                                                                                                                                                                        |
| <b>Results</b>           |         |                                                                                                                                                                                                               |
| Participants             | 13*     | ✓(a) Report numbers of individuals at each stage of study—eg numbers potentially eligible, examined for eligibility, confirmed eligible, included in the study, completing follow-up, and analysed            |
|                          |         | (b) Give reasons for non-participation at each stage <i>n/a</i>                                                                                                                                               |
|                          |         | ✓(c) Consider use of a flow diagram                                                                                                                                                                           |
| Descriptive data         | 14*     | ✓(a) Give characteristics of study participants (eg demographic, clinical, social) and information on exposures and potential confounders                                                                     |
|                          |         | (b) Indicate number of participants with missing data for each variable of interest                                                                                                                           |
|                          |         | (c) Summarise follow-up time (eg, average and total amount)                                                                                                                                                   |
| Outcome data             | 15*     | ✓ Report numbers of outcome events or summary measures over time                                                                                                                                              |
| Main results             | 16      | ✓(a) Give unadjusted estimates and, if applicable, confounder-adjusted estimates and their precision (eg, 95% confidence interval). Make clear which confounders were adjusted for and why they were included |

|                          |    |                                                                                                                                                                             |
|--------------------------|----|-----------------------------------------------------------------------------------------------------------------------------------------------------------------------------|
|                          |    | ✓(b) Report category boundaries when continuous variables were categorized                                                                                                  |
|                          |    | (c) If relevant, consider translating estimates of relative risk into absolute risk for a meaningful time period                                                            |
| Other analyses           | 17 | ✓Report other analyses done—eg analyses of subgroups and interactions, and sensitivity analyses                                                                             |
| <b>Discussion</b>        |    |                                                                                                                                                                             |
| Key results              | 18 | ✓Summarise key results with reference to study objectives                                                                                                                   |
| Limitations              | 19 | ✓Discuss limitations of the study, taking into account sources of potential bias or imprecision. Discuss both direction and magnitude of any potential bias                 |
| Interpretation           | 20 | ✓Give a cautious overall interpretation of results considering objectives, limitations, multiplicity of analyses, results from similar studies, and other relevant evidence |
| Generalisability         | 21 | ✓Discuss the generalisability (external validity) of the study results                                                                                                      |
| <b>Other information</b> |    |                                                                                                                                                                             |
| Funding                  | 22 | ✓Give the source of funding and the role of the funders for the present study and, if applicable, for the original study on which the present article is based              |

\*Give information separately for exposed and unexposed groups.

**Note:** An Explanation and Elaboration article discusses each checklist item and gives methodological background and published examples of transparent reporting. The STROBE checklist is best used in conjunction with this article (freely available on the Web sites of PLoS Medicine at <http://www.plosmedicine.org/>, Annals of Internal Medicine at <http://www.annals.org/>, and Epidemiology at <http://www.epidem.com/>). Information on the STROBE Initiative is available at <http://www.strobe-statement.org>.





**Access to rheumatologists among patients with newly diagnosed rheumatoid arthritis in a Canadian universal public health care system**

|                                 |                                                                                                                                                                                                                                                                                                                                                                                                                                                                                                                                                                                                                                                                     |
|---------------------------------|---------------------------------------------------------------------------------------------------------------------------------------------------------------------------------------------------------------------------------------------------------------------------------------------------------------------------------------------------------------------------------------------------------------------------------------------------------------------------------------------------------------------------------------------------------------------------------------------------------------------------------------------------------------------|
| Journal:                        | <i>BMJ Open</i>                                                                                                                                                                                                                                                                                                                                                                                                                                                                                                                                                                                                                                                     |
| Manuscript ID:                  | bmjopen-2013-003888.R1                                                                                                                                                                                                                                                                                                                                                                                                                                                                                                                                                                                                                                              |
| Article Type:                   | Research                                                                                                                                                                                                                                                                                                                                                                                                                                                                                                                                                                                                                                                            |
| Date Submitted by the Author:   | 13-Dec-2013                                                                                                                                                                                                                                                                                                                                                                                                                                                                                                                                                                                                                                                         |
| Complete List of Authors:       | Widdifield, Jessica; University of Toronto, Paterson, J. Michael; Institute for Clinical Evaluative Sciences, Bernatsky, Sasha; Research Institute of the McGill University Health Centre, Division of Clinical Epidemiology<br>Tu, Karen; Institute for Clinical Evaluative Sciences, Thorne, J Carter; Southlake Regional Health Centre, Ivers, Noah; Women's College Hospital, Toronto<br>Butt, Debra; University of Toronto, Jaakkimainen, R. Liisa; Institute for Clinical Evaluative Sciences, Gunraj, Nadia; Institute for Clinical Evaluative Sciences, Ahluwalia, Vandana; William Osler Health Center, Bombardier, Claire; Institute for Work and Health, |
| <b>Primary Subject Heading</b>: | Rheumatology                                                                                                                                                                                                                                                                                                                                                                                                                                                                                                                                                                                                                                                        |
| Secondary Subject Heading:      | General practice / Family practice, Health services research                                                                                                                                                                                                                                                                                                                                                                                                                                                                                                                                                                                                        |
| Keywords:                       | RHEUMATOLOGY, Quality in health care < HEALTH SERVICES ADMINISTRATION & MANAGEMENT, Rheumatology < INTERNAL MEDICINE                                                                                                                                                                                                                                                                                                                                                                                                                                                                                                                                                |
|                                 |                                                                                                                                                                                                                                                                                                                                                                                                                                                                                                                                                                                                                                                                     |

## TITLE PAGE

**TITLE: Access to rheumatologists among patients with newly diagnosed rheumatoid arthritis in a Canadian universal public health care system.**

**Jessica Widdifield<sup>1,2</sup> BSc, PhD; J. Michael Paterson<sup>1,2,3</sup> MSc; Sasha Bernatsky<sup>4</sup> MD, FRCPC, PhD; Karen Tu<sup>1,2</sup> MD, MSc; J. Carter Thorne<sup>5</sup> MD, FRCPC, Noah Ivers<sup>1,2,6</sup> MD, PhD(c), Debra Butt<sup>1</sup>, MD, MSc; R. Liisa Jaakkimainen<sup>1,2,7</sup> MD, MSc, Nadia Gunraj<sup>2</sup> BSc, MPH; Vandana Ahluwalia<sup>8</sup> MD, FRCPC, Claire Bombardier<sup>1</sup>, MD, MSc, FRCPC.**

**Affiliations:**

1. *University of Toronto, Toronto, ON;*
2. *Institute for Clinical Evaluative Sciences, Toronto, ON;*
3. *McMaster University, Hamilton, ON;*
4. *McGill University, Montreal, QC;*
5. *Southlake Regional Health Centre, Newmarket, ON;*
6. *Women's College Hospital, Toronto, ON;*
7. *Sunnybrook Health Sciences Centre, Toronto, ON;*
8. *William Osler Health Center, Brampton, ON;*

**Correspondence to:**

Jessica Widdifield

200 Elizabeth St 13EN-224 Toronto ON M5G 2C4 CANADA

Tel: 416-340-4856 / Fax: 416-340-4814 / E-mail: [jessica.widdifield@utoronto.ca](mailto:jessica.widdifield@utoronto.ca)**Abstract word count:** 247**Manuscript word count:** 2672 (excluding abstract)**No. of Pages:** 20**No. of Figures:** 2**No. of Tables:** 3**Key words:** Rheumatoid arthritis, quality of care, access to care

**ABSTRACT**

Our objective was to estimate the percent of incident rheumatoid arthritis (RA) patients who saw a rheumatologist within 3, 6 and 12 months of suspected diagnosis by a family physician, and assess what factors may influence the time frame with which patients are seen.

**Methods:**

Over 2000-2009, we studied incident RA patients who were initially diagnosed by a family physician. We assessed secular trends in rheumatology encounters and differences between patients who saw vs. did not see a rheumatologist. We performed hierarchical logistic regression analyses to determine whether receipt of rheumatology care was associated with patient, primary care physician, and geographic factors.

**Results:**

Among 19,760 incident RA patients, 59%, 75% and 84% of patients saw a rheumatologist within 3, 6 and 12 months, respectively. The prevalence of initial consultations within 3 months did not increase over time, however, access within 6 and 12 months increased over time. Factors positively associated with timely consultations included higher regional rheumatology supply [adjusted Odds Ratio, aOR 1.35(95% CI 1.13,1.60)] and higher patient socioeconomic status [aOR 1.18(95%CI 1.07,1.30)]. Conversely, factors inversely associated with timely consultations included remote patient residence [aOR 0.51(95% CI 0.41,0.64)], and male family physicians [aOR 0.88(95% CI 0.81,0.95)].

**Conclusion:**

Increasing access to rheumatologists within 6 and 12 months occurred over time, however consultations within 3 months did not change over time. Measures of poor access (such as proximity to and density of rheumatologists) were negatively associated with timely consultations. Additional factors that contributed to disparities in access included patient socioeconomic status and physician sex.

**N=252**

**Article focus:**

- In a large population-based cohort of patients with newly diagnosed rheumatoid arthritis (RA) in Canada, our study's aim was to determine the percent of incident RA patients who saw a rheumatologist within 3, 6 and 12 months of suspected diagnosis by a family physician, and assessed what factors may influence the time frame with which patients are seen.

**Key messages:**

- We found increasing access to rheumatologists within 6 and 12 months have occurred over time, however consultations within 3 months did not change over time.
- Overall, 41% of patients are still not seen within 3 months of a primary care diagnosis as recommended by current guidelines. Thus, an important proportion of patients are not receiving optimal care. However, we studied only a proportion of the total delay from the onset of the patients' symptoms to rheumatology care. It is unknown how long patients have symptoms before seeking medical care, or remain in primary care before their RA is recognized. Therefore the delays between onset of symptoms to rheumatology care may be larger than reported here.
- Measures of poor access (such as proximity to and density of rheumatologists) were negatively associated with timely consultations. Additional factors that contributed to disparities in access included patient socioeconomic status and physician sex. Strategies to facilitate more timely access, such as improving proximity to and density of rheumatologists along with family physician education on initiating more timely referrals, are acutely needed.

**Strengths and limitations of this study:**

- Strengths of our study include its large sample and the use of a validated population-based RA cohort.
- Our main limitation is that our cohort definition requires patients whose family physician strongly suspects that the patient has RA, thus, our analyses are likely restricted to patients with a more homogeneous clinical presentation (such as rheumatoid factor positive patients) or those with more active disease.

1  
2  
3  
4 Rheumatoid arthritis (RA) is a progressive inflammatory arthritis associated with joint damage and  
5 functional deterioration, work disability and premature mortality.[1] At disease onset, RA is considered  
6 an urgent medical condition[1 2] requiring prompt referral to a rheumatologist.[3-5] Timely  
7 rheumatology care is important as it increases early exposure to treatment,[6] improves patient  
8 outcomes,[7][8] decreases the need for costly surgical interventions,[9] and thus reduces the global  
9 disease burden. Furthermore, the sooner a patient is seen and managed by rheumatologists results in  
10 superior clinical responses and increases the chance of disease remission[10][11][12][13][14] than if  
11 the same care is administered later in the disease course.[15]  
12  
13  
14  
15  
16  
17  
18  
19  
20  
21  
22  
23  
24

25  
26 In Canada, access to specialists often depends on referral by a family physician. For optimal RA care  
27 to occur, a patient must seek care by a family physician, who, in turn, must suspect RA and initiate  
28 referral to a rheumatologist, who will undertake the appropriate diagnostic tests and initiate early  
29 treatment.[16] Delays that occur at any of these stages prevent patients from receiving timely care.  
30  
31  
32  
33  
34  
35  
36

37 Ontario has approximately 13 million residents and 10,000 family physicians.[17] There are  
38 approximately 150 rheumatologists (1.5 rheumatologists per 100,000 population), however, they are  
39 concentrated most heavily in southern Ontario[18], which may be a potential barrier to equitable,  
40 timely rheumatology care.[19] Accordingly, we set out to determine the percent of incident RA patients  
41 who saw a rheumatologist within 3, 6 and 12 months of suspected diagnosis by a family physician, and  
42 assessed what factors may influence the time frame with which patients are seen.  
43  
44  
45  
46  
47  
48  
49  
50  
51  
52  
53

## 54 **SUBJECTS AND METHODS:**

55  
56 **Setting and Design.** We performed a retrospective, population-based cohort study of newly diagnosed  
57 RA patients within Ontario, in which all residents are covered by universal public health insurance for  
58  
59  
60

1  
2 physician and hospital services. The study was approved by the Research Ethics Board at Sunnybrook  
3  
4 Health Sciences Centre, Toronto, Canada.  
5  
6  
7  
8

9 **Data sources.** We used the Ontario Rheumatoid Arthritis administrative Database (ORAD), a  
10 population-based RA cohort generated from health administrative databases using a validated case  
11 definition. RA patients are included in ORAD if they have 3 Ontario Health Insurance (OHIP)  
12 physician service claims over a two-year period in which RA is the recorded diagnosis, with at least 1  
13 of these claims made by a musculoskeletal specialist. ORAD has been validated and shown to have a  
14 high sensitivity (78%), specificity (100%), and positive predictive value (78%) for identifying RA  
15 patients based on medical record reviews.[20]:[21] Validation of RA onset within administrative data  
16 has also shown to be highly accurate.[21] Records for individuals in ORAD are also linked to the  
17 following administrative datasets. The Ontario Registered Persons Database was used to identify  
18 demographic information on age, sex, place of residence, death, and emigration. Physician specialty  
19 was obtained by linking the Institute for Clinical Evaluative Sciences (ICES) Physician Database with  
20 the OHIP database.[22] We used the Client Agency Program Enrolment Database to identify the  
21 primary care delivery model of the family physician at the time the patient entered the cohort. These  
22 datasets are linked in an anonymous fashion using encrypted health insurance numbers for residents  
23 and encrypted license numbers for physicians, and they have very little missing information.[23]  
24  
25  
26  
27  
28  
29  
30  
31  
32  
33  
34  
35  
36  
37  
38  
39  
40  
41  
42  
43  
44  
45  
46

47 **Cohort definition.** We identified all incident RA patients from April 1, 2000 to March 31, 2010.  
48 Analyses were restricted to patients whose initial RA diagnosis codes were assigned by a family  
49 physician in an outpatient setting. Cohort entry (suspected RA diagnosis date) was the date of the first  
50 RA diagnosis code, and patients were followed up until one year or until outmigration, death, or the  
51 end of study period.  
52  
53  
54  
55  
56  
57  
58  
59  
60

1  
2 **Covariate information.** Covariates for patient demographics included age, sex, socioeconomic status  
3  
4 (SES), and year of suspected diagnosis. SES was defined as the patient's neighbourhood median  
5  
6 household income quintile from the Statistics Canada Census. We also identified whether patients were  
7  
8 subsequently admitted to hospital with an RA diagnosis following a primary care diagnosis, as patients  
9  
10 who are seen in a hospital setting for their RA may have poorer access to health care providers and/or  
11  
12 more severe disease. As a measure of co-morbidity, we used the Johns Hopkins Adjusted Diagnostic  
13  
14 Groups (ADG) Case-Mix System derived from both outpatient and inpatient data in the two years  
15  
16 preceding cohort entry.[24] We categorized ADGs into low (<5), moderate (5-9), and high co-  
17  
18 morbidity (10+). We chose this risk adjustment method as patients using the most health care resources  
19  
20 are not typically those with single diseases but rather those with multiple and sometimes unrelated  
21  
22 conditions. This clustering of morbidity can be a better predictor of health care use than the presence of  
23  
24 specific diseases.[25] Geographic characteristics included patient residence, regional health service  
25  
26 planning areas (Local Health Integration Networks, LHINs[26]), rheumatology supply and distance to  
27  
28 the closest rheumatologist. Rurality was based upon each patient's postal code and a community  
29  
30 population size of less than 10,000. Rheumatology supply was defined as the number of  
31  
32 rheumatologists per 100,000 adults in the planning area (LHIN) of patient residence, and distance to  
33  
34 the closest rheumatologist was the linear distance from the centre of patient's postal code area to that of  
35  
36 the closest rheumatologist, with 'remote residence' defined as 100 or more kilometers (km) to the  
37  
38 nearest rheumatologist. Family physician characteristics included sex, years since graduation (as a  
39  
40 proxy for experience), and type of primary care delivery model the family physician was working in at  
41  
42 the time of patient's cohort entry. We categorized each practice type as (1) *blended capitation models*  
43  
44 [Family Health Networks (FHNs), Family Health Organizations (FHOs), Family Health Teams  
45  
46 (FHTs)], and (2) *enhanced fee-for-service models* (Family Health Groups or FHGs) and other groups  
47  
48 and *traditional fee-for-service practitioners*. [27] The main difference between the models is how  
49  
50 physicians are reimbursed (e.g., through age-and-sex-adjusted capitation payments versus being paid  
51  
52  
53  
54  
55  
56  
57  
58  
59  
60

1  
2 on a per visit basis). Capitation models often include interdisciplinary teams involving allied healthcare  
3  
4 providers and require physicians to maintain a list or 'roster' of enrolled patients to whom they are  
5  
6 committed to providing primary care.[28] Including primary care model type enabled us to explore if  
7  
8 there was an effect regarding different primary care practice models and/or how the physicians are paid  
9  
10 as a facilitator to timely rheumatology care.  
11  
12

13  
14  
15  
16 **Outcome Measurements.** We followed incident patients, determining whether they had a visit to a  
17  
18 rheumatologist at three, six and 12 months.  
19  
20

21  
22  
23 **Statistical analysis.** Descriptive statistics were used to characterize the study population. We assessed  
24  
25 secular trends (as the percentage of each annual incident RA cohort who saw a rheumatologist within  
26  
27 each time period) and differences among patients who received vs. did not receive rheumatology care.  
28  
29 We performed hierarchical logistic regression analyses to determine whether receipt of rheumatology  
30  
31 care was associated with patient demographics, co-morbidity, geographic characteristics, and family  
32  
33 physician characteristics. Crude and adjusted odds ratio (aOR) estimates with 95% confidence  
34  
35 intervals (CIs) were generated. Separate analyses were performed for each outcome end date  
36  
37 (benchmarks): three, six and 12 months.  
38  
39  
40  
41  
42  
43

44 All analyses were performed at the ICES on anonymized data using SAS version 9.2 (SAS Institute,  
45  
46 Cary, North Carolina).  
47  
48

## 49 50 51 **RESULTS:**

52  
53  
54 Between 2000 and 2009, we identified 19,670 incident RA patients (figure 1). Overall, the mean  
55  
56 (standard deviation, SD) age at time of cohort entry was 54 (16) years, 71% were female, 16% resided  
57  
58 in rural areas and 5% resided in areas remote ( $\geq 100$  km) from the nearest rheumatologist (table 1).  
59  
60



1  
2 Most patients were seen by male family physicians (70%). Few (5%) physicians were practicing under  
3  
4 a newer capitation model.  
5  
6  
7

8  
9 Over one year of follow-up, the average time from the first RA diagnosis code to first rheumatologist  
10  
11 visit was 77 days (table 1). Over all, 59%, 75% and 84% of patients saw a rheumatologist within 3, 6  
12  
13 and 12 months, respectively. The prevalence of initial rheumatology encounters within 3 months did  
14  
15 not increase over the study period. However, the percentage of patients who saw a rheumatologist  
16  
17 within 6 and 12 months increased gradually over time, from 72% and 81% in 2000 to 81% and 89% in  
18  
19 2009, respectively (figure 2).  
20  
21  
22  
23

24  
25 Table 2 compares the characteristics of patients who saw vs. did not see a rheumatologist within 3  
26  
27 months of cohort entry. More patients who were not seen by a rheumatologist lived in a rural area (19%  
28  
29 vs 14%) and remote areas.  
30  
31  
32  
33

34  
35 Independent determinants of receiving rheumatology care within 3 months of RA diagnosis are  
36  
37 reported in Table 2. Factors associated with prompt rheumatology care included increasing  
38  
39 rheumatology supply [aOR 1.35 (95% CI 1.13,1.60)] and higher patient SES [aOR 1.18 (95% CI  
40  
41 1.07,1.30)]. The strongest independent factor negatively associated with lower frequency of  
42  
43 rheumatology visits was for patients who lived at remote distances to rheumatologists [aOR 0.51 (95%  
44  
45 CI 0.41,0.64)]. The likelihood of not having prompt rheumatology consultations was also reduced for  
46  
47 patients of male family physicians [aOR 0.87 (95% CI 0.81,0.95)]. There was no calendar-year effect  
48  
49 illustrating an increasing likelihood of seeing a rheumatologist within 3 months over time. However,  
50  
51 improvements over time were demonstrated for patients being seen by a rheumatologist within 6 and  
52  
53 12 months (table 3).  
54  
55  
56  
57  
58  
59  
60

1  
2 We observed similar associations when we studied the effects of factors on the odds of receiving  
3 rheumatology care within 6 and 12 months (table 3). The effect of proximity on access became stronger  
4 as the time to rheumatology visit was lengthened: 6 months, aOR 0.56 (95% CI 0.36,0.59); 12 months,  
5  
6  
7 aOR 0.33 (95% CI 0.26,0.43). Patients who were hospitalized for RA subsequent to an initial  
8  
9  
10 diagnosis in an outpatient primary care setting were almost half as likely to been seen by a  
11  
12  
13 rheumatologist at 6 and 12 months.  
14

## 15 16 17 18 19 **Discussion**

20  
21  
22 In a publicly-funded universal healthcare system, we studied trends in encounters with rheumatologists  
23 over the past decade and observed increasing rates of access to rheumatologists within 6 months and 12  
24  
25 months after diagnosis by a family physician. However, no such improvements were observed among  
26  
27 patients seen within 3 months, a more favorable benchmark. We also explored whether receipt of  
28  
29 rheumatology care was associated with patient and family physician characteristics, and measures of  
30  
31 rheumatology supply. We found that patients of higher SES were more likely to receive timely  
32  
33 rheumatology care, which has also been demonstrated in other Canadian provinces.[29]:[30] Further,  
34  
35  
36 proximity to and density of rheumatologists were important determinants of timely rheumatology care.  
37  
38  
39

40  
41  
42  
43 While our results appear encouraging, 41% of patients are still not seen within 3 months of a primary  
44  
45 care diagnosis as recommended by current guidelines. Thus, an important proportion of patients are  
46  
47 not receiving optimal care. When interpreting the results it is important to recognize that the delay in  
48  
49 rheumatology consultation being studied represents only a proportion of the total delay from the onset  
50  
51 of the patients' symptoms. While a previous study reported that the patient delay is very small relative  
52  
53 to the family physician delay[31], in our study, it is unknown how long patients have symptoms before  
54  
55 seeking medical care, or remain in primary care before their RA is recognized. Therefore the delays  
56  
57  
58  
59  
60

1  
2 between onset of symptoms to rheumatology care may be larger than reported here. Conversely, we are  
3  
4 also unaware of the disease activity and functional status of the subgroup of patients who do not  
5  
6 receive timely rheumatology care within three months. Recent data from a large early arthritis clinic  
7  
8 indicated that 60% of patients had self-limited symptoms.[32] Therefore, a delay of three months in  
9  
10 receipt of rheumatology care may not always be as deleterious to the likelihood of a good response or  
11  
12 remission.[33]  
13  
14

15  
16  
17  
18 Given the high economic impact of RA[34], rheumatologists are key to an integrated healthcare  
19  
20 delivery system.[35] However, not all patients are receiving the right care at the right time. Delays in  
21  
22 timely consultations may reflect the growing burden of RA relative to rheumatology supply. During  
23  
24 our study period, the number of rheumatologists in Ontario remained relatively stable (1.5  
25  
26 rheumatologists per 100,000 population).[18 36] While most RA patients were seen by a  
27  
28 rheumatologist within 1 year, delays in more timely benchmarks may also be indicative of the need to  
29  
30 educate primary care physicians to initiate rheumatology referrals sooner. Ultimately, delays in access  
31  
32 to timely, quality care and treatment result in increasing disability for RA patients as well as increasing  
33  
34 costs to the healthcare system.[34]  
35  
36  
37  
38  
39  
40  
41

42 Geographic variation in receipt of timely rheumatology care may be indicative of problems with  
43  
44 access. Considering the geographic size and features of Ontario, approximately one-quarter of  
45  
46 Ontarians resides in communities with 30,000 or fewer residents.[37] However, few rheumatologists  
47  
48 practice in rural communities.[18] Consequently, the threshold for referral to rheumatologists may be  
49  
50 higher in remote versus urban communities (i.e., rural patients who are referred have substantially more  
51  
52 active disease than their urban counterparts).[36]:[6] Thus, there is a need to address the low  
53  
54 rheumatology supply among remote communities.  
55  
56  
57  
58  
59  
60

1  
2 Additionally, there was a low likelihood of being seen by a rheumatologist within 6 or 12 months  
3  
4 subsequent to a hospital encounter for RA after a patient was initially diagnosed in a primary care  
5  
6 setting. In areas with few rheumatologists, family physicians may have no choice but to encourage  
7  
8 patients to seek hospital-based specialty care. In addition, while most rheumatologists have a hospital  
9  
10 appointment, not all hospitals have rheumatologists.[38] Thus, our findings reinforce the need for  
11  
12 strategies to not only improve access to rheumatologists but also to encourage proper follow-up for  
13  
14 these patients.  
15  
16  
17  
18  
19  
20

21 Our results showed that patients of female family physicians were more likely to receive rheumatology  
22  
23 care earlier. While there is conflicting data on the influence of physician gender on practice  
24  
25 styles,[39]:[40] female physicians have been shown to engage in more preventive services and to  
26  
27 communicate differently with their patients.[41] Male physicians may have more confidence in  
28  
29 managing RA in primary care, such as starting glucocorticoids prior to rheumatology encounters.  
30  
31 Similarly, patients have also reported to have more confidence in male physicians[42] and thus may be  
32  
33 more hesitant to seek secondary care. Together, this may explain why RA patients of female family  
34  
35 physicians are more likely to be seen by rheumatologists earlier and that the influence of physician  
36  
37 gender was attenuated at 1-year post-initial RA diagnosis.  
38  
39  
40  
41  
42  
43  
44

45 We also sought to evaluate the influence of primary care models on rheumatology encounters. We  
46  
47 hypothesized that patients of capitation models, which involve interdisciplinary teams, allied health  
48  
49 providers and where patient enrollment is most strongly encouraged, could improve continuity of care  
50  
51 with their patients that could ultimately affect the quality of care that these patients receive. While we  
52  
53 found no association, it may be too soon to determine an effect as many physicians changed models  
54  
55 over time and few physicians were practicing under a capitation model during the study period.[43]  
56  
57  
58  
59  
60

1  
2 Strengths of our study include its large sample and the use of a validated population-based RA  
3 cohort.[21] Our main limitation is that our cohort definition requires patients to have had their first RA  
4 diagnosis code provided by a family physician (i.e. those whose physician strongly suspects that the  
5 patient has RA). While others have used this approach,[9] our analyses are likely restricted to patients  
6 with a more homogeneous clinical presentation (such as rheumatoid factor positive patients) or those  
7 with more active disease in which the family physician was able to accurately diagnose the condition  
8 and/or more likely to use an RA billing code as a reason for visit. Therefore we may be over-estimating  
9 the proportion of patients with timely rheumatology encounters. These related caveats are owing to the  
10 absence of both symptom onset and date of referral in health administrative databases. Future research  
11 is required to develop and validate algorithms to better predict RA onset from administrative data.  
12 However, previous researchers have also used physician service claims to sample RA patients from  
13 rheumatology practices in order to calculate wait times on a smaller scale, and these studies may be  
14 subjected to similar biases (inclusion of early RA patients with a more homogenous clinical  
15 presentation).[9][44]

16  
17  
18  
19  
20  
21  
22  
23  
24  
25  
26  
27  
28  
29  
30  
31  
32  
33  
34  
35  
36  
37 In conclusion, we found increasing access to rheumatologists within 6 and 12 months over time,  
38 however rheumatology encounters within 3 months did not change over time. Measures of poor access  
39 negatively impacted rates of encounters with a rheumatologist. Factors that contributed to disparities in  
40 rheumatology access included SES and physician sex. Strategies to facilitate more timely access, such  
41 as improving proximity to and density of rheumatologists along with family physician education on  
42 initiating more timely referrals, are acutely needed.  
43  
44  
45  
46  
47  
48  
49  
50  
51  
52  
53  
54  
55  
56  
57  
58  
59  
60

1  
2  
3  
4  
5  
6  
7  
8  
9  
10  
11  
12  
13  
14  
15  
16  
17  
18  
19  
20  
21  
22  
23  
24  
25  
26  
27  
28  
29  
30  
31  
32  
33  
34  
35  
36  
37  
38  
39  
40  
41  
42  
43  
44  
45  
46  
47  
48  
49  
50  
51  
52  
53  
54  
55  
56  
57  
58  
59  
60

**Figure legends**

**Figure 1.** Flow diagram of selection of study participants

**Figure 2: Percentage of patients with newly diagnosed RA who are seen by a rheumatologist within 3, 6 and 12 months of suspected diagnosis by a primary care physician.**

For peer review only

**Table 1: Selected cohort characteristics of 19,670 newly diagnosed RA patients that met our criteria**

| Characteristic                                                                                                                                                                                                                                                                                         | Newly diagnosed<br>RA<br>n=19,670 |
|--------------------------------------------------------------------------------------------------------------------------------------------------------------------------------------------------------------------------------------------------------------------------------------------------------|-----------------------------------|
| <b>Patient Demographics</b>                                                                                                                                                                                                                                                                            |                                   |
| Age at cohort entry, mean (SD)                                                                                                                                                                                                                                                                         | 53.7 (16.3)                       |
| Female, n (%)                                                                                                                                                                                                                                                                                          | 14,091 (71.1)                     |
| Rural residence, n (%)                                                                                                                                                                                                                                                                                 | 3,196 (16.2)                      |
| <b>Patient Co-morbidity</b>                                                                                                                                                                                                                                                                            |                                   |
| Number of Hopkins ADGs* in the 2 years prior to entry, n (%)                                                                                                                                                                                                                                           |                                   |
| < 5                                                                                                                                                                                                                                                                                                    | 5,229 (26.5)                      |
| 5-9                                                                                                                                                                                                                                                                                                    | 9,790 (49.5)                      |
| 10+                                                                                                                                                                                                                                                                                                    | 4,741 (24.0)                      |
| <b>Rheumatology Access Measures</b>                                                                                                                                                                                                                                                                    |                                   |
| Time (days) from first diagnosis code to first rheumatologist visit, mean (SD)                                                                                                                                                                                                                         | 76.7 (76.9)                       |
| Time (days) from first diagnosis code to first rheumatologist visit, median (IQR)                                                                                                                                                                                                                      | 50 (22-104)                       |
| Rheumatology supply per 100 000 adults†, mean (SD)                                                                                                                                                                                                                                                     | 1.5 (1.1)                         |
| Distance to closest rheumatologist                                                                                                                                                                                                                                                                     |                                   |
| Kilometers, mean (SD)                                                                                                                                                                                                                                                                                  | 24.2 (69.7)                       |
| Remote (≥100 km), n (%)                                                                                                                                                                                                                                                                                | 1,047 (5.3)                       |
| <b>Primary care physician characteristics</b>                                                                                                                                                                                                                                                          |                                   |
| Male, n (%)                                                                                                                                                                                                                                                                                            | 13,872 (70.2)                     |
| Years since graduation, mean (SD)                                                                                                                                                                                                                                                                      | 24.5 (10.5)                       |
| Practice type, n (%)                                                                                                                                                                                                                                                                                   |                                   |
| Blended capitation models†† (FHO / FHN)                                                                                                                                                                                                                                                                | 976 (4.9)                         |
| Traditional fee-for-service and enhanced fee-for-service (FHG/Other)                                                                                                                                                                                                                                   | 18,784 (95.1)                     |
| * Ambulatory diagnostic groups                                                                                                                                                                                                                                                                         |                                   |
| † in patient Local Health Integration Networks, LHINs (regional health service planning areas)                                                                                                                                                                                                         |                                   |
| †† Practice types: <i>blended capitation models</i> [Family Health Networks (FHNs), Family Health Organizations (FHOs), Family Health Teams (FHTs), an interprofessional team model composed of FHNs and FHOs], <i>enhanced fee-for-service models</i> [Family Health Groups (FHGs) and other groups], |                                   |

**Table 2: Descriptive characteristics for RA patients that do and do not receive rheumatology care and influence of various factors on receipt of rheumatology care within THREE months of suspected diagnosis by a primary care physician**

| Characteristic                                                                               | Seen by a rheumatologist |               | Multivariate analysis   |                          |
|----------------------------------------------------------------------------------------------|--------------------------|---------------|-------------------------|--------------------------|
|                                                                                              | Yes<br>n=11,694          | No<br>N=8,066 | Crude OR*<br>[95% CI]** | Adjusted† OR<br>[95% CI] |
| <b>Demographics</b>                                                                          |                          |               |                         |                          |
| Age, mean (SD)                                                                               | 53.8 (15.9)              | 53.6 (16.7)   | 1.00 [1.00, 1.00]       | 1.00 [1.00, 1.00]        |
| Male sex, n (%) [REF=Female]                                                                 | 3,341 (28.6)             | 2,328 (28.9)  | 1.01 [0.95, 1.07]       | 1.04 [0.97, 1.11]        |
| Income quintile, n(%) [REF = 1 – low]                                                        | 59 (0.5)                 | 50 (0.6)      | REF                     | REF                      |
| 2                                                                                            | 2,197 (18.8)             | 1,693 (21)    | 1.10 [1.00, 1.20]       | 1.08 [0.98, 1.18]        |
| 3                                                                                            | 2,359 (20.2)             | 1,657 (20.5)  | 1.12 [1.03, 1.23]       | 1.11 [1.01, 1.22]        |
| 4                                                                                            | 2,407 (20.6)             | 1,627 (20.2)  | 1.12 [1.02, 1.23]       | 1.09 [0.99, 1.20]        |
| 5                                                                                            | 2,305 (19.7)             | 1,581 (19.6)  | 1.22 [1.11, 1.34]       | 1.18 [1.07, 1.30]        |
| Calendar Year of Cohort Entry [REF=2000]                                                     |                          |               |                         |                          |
| 2000                                                                                         | 1,110                    | 774           | REF                     | REF                      |
| 2001                                                                                         | 1,110                    | 768           | 0.99 [0.87, 1.13]       | 0.99 [0.87, 1.14]        |
| 2002                                                                                         | 1,074                    | 736           | 1.00 [0.87, 1.14]       | 1.00 [0.87, 1.15]        |
| 2003                                                                                         | 1,154                    | 830           | 0.96 [0.85, 1.10]       | 0.99 [0.87, 1.13]        |
| 2004                                                                                         | 1,187                    | 872           | 0.94 [0.83, 1.08]       | 0.99 [0.87, 1.14]        |
| 2005                                                                                         | 1,231                    | 828           | 1.05 [0.92, 1.20]       | 1.12 [0.98, 1.28]        |
| 2006                                                                                         | 1,179                    | 782           | 1.07 [0.94, 1.22]       | 1.13 [0.98, 1.29]        |
| 2007                                                                                         | 1,237                    | 818           | 1.07 [0.94, 1.23]       | 1.14 [0.99, 1.31]        |
| 2008                                                                                         | 1,268                    | 885           | 1.01 [0.89, 1.16]       | 1.10 [0.96, 1.26]        |
| 2009                                                                                         | 1,144                    | 773           | 1.03 [0.90, 1.18]       | 1.10 [0.95, 1.27]        |
| <b>Co-morbidity: Number of Hopkins ADGs in the 2 years prior to entry, n (%) (REF=&lt;5)</b> |                          |               |                         |                          |
| < 5                                                                                          | 3,031 (25.9)             | 2,198 (27.3)  | REF                     | REF                      |
| 5-9                                                                                          | 5,802 (49.6)             | 3,988 (49.4)  | 1.04 [0.97, 1.12]       | 1.04 [0.97, 1.12]        |
| 10+                                                                                          | 2,861 (24.5)             | 1,880 (23.3)  | 1.08 [0.99, 1.18]       | 1.07 [0.98, 1.17]        |
| Hospitalization for RA prior to rheumatologist visit / end of study period, n(%)             | 71 (0.6)                 | 41 (0.5)      | 1.24 [0.84, 1.84]       | 1.34 [0.89, 2.02]        |
| <b>Geographic</b>                                                                            |                          |               |                         |                          |
| Patient Rural residence, n(%) [REF=urban]                                                    | 1,636 (14.0)             | 1,560 (19.3)  | 0.70 [0.64, 0.76]       | 0.92 [0.83, 1.01]        |
| Rheumatology supply per 100 000 adults, mean (SD)                                            | 1.6 (1.1)                | 1.4 (1.0)     | 1.16 [1.12, 1.19]       | 1.35 [1.13, 1.60]        |
| Distance to rheumatologist (km), mean (SD)                                                   | 17.8 (64.24)             | 33.6 (75.89)  | n/a                     | n/a                      |
| Remote Distance (≥100 km to rheumatologist), n(%)                                            | 312 (2.7)                | 735 (9.1)     | 0.29 [0.25, 0.34]       | 0.51 [0.41, 0.64]        |
| <b>Primary Care physician</b>                                                                |                          |               |                         |                          |
| Male sex, n (%) (REF=Female)                                                                 | 8,069 (69.0)             | 5,803 (71.9)  | 0.83 [0.77, 0.89]       | 0.87 [0.81, 0.95]        |
| Years since graduation, mean (SD)                                                            | 24.3 (10.48)             | 24.6 (10.53)  | 1.00 [0.99, 1.00]       | 1.00 [0.99, 1.00]        |
| Practice type††, n (%) (REF=fee-for-service)                                                 |                          |               |                         |                          |
| Traditional and Enhanced fee-for-service                                                     | 11,085 (94.8)            | 7,699 (95.5)  | REF                     | REF                      |
| Blended capitation models                                                                    | 609 (5.2)                | 367 (4.5)     | 1.14 [0.98, 1.32]       | 1.15 [0.99, 1.34]        |

\*OR = Odds Ratio; \*\*95% CI = 95% confidence interval

†Adjusted for all covariates including: patient demographics, clinical factors, primary care physician characteristics, provider continuity, and geographic characteristics [including regional variation by regional health service planning areas Local Health Integration Networks (LHINs) not reported here.]

††Practice types: *blended capitation models* [Family Health Networks (FHNs), Family Health Organizations (FHOs), Family Health Teams (FHTs), an interprofessional team model composed of FHNs and FHOs], *enhanced fee-for-service models* [Family Health Groups (FHGs) and other groups], and *solo fee-for-service practitioners* (those who did not belong to a model).



**Table 3: Influence of patient demographics, co-morbidity, geographic characteristics, and primary care physician characteristics on receipt of rheumatology care within 6 and 12 months**

| Characteristic                                                                                                                                                                                                                                                                                                                                                                                                                                                                                                                                                                                                                                                                                                      | 6 months                |                          | 12 months            |                          |
|---------------------------------------------------------------------------------------------------------------------------------------------------------------------------------------------------------------------------------------------------------------------------------------------------------------------------------------------------------------------------------------------------------------------------------------------------------------------------------------------------------------------------------------------------------------------------------------------------------------------------------------------------------------------------------------------------------------------|-------------------------|--------------------------|----------------------|--------------------------|
|                                                                                                                                                                                                                                                                                                                                                                                                                                                                                                                                                                                                                                                                                                                     | Crude OR*<br>[95% CI]** | Adjusted† OR<br>[95% CI] | Crude OR<br>[95% CI] | Adjusted OR<br>[95% CI]  |
| <b>Demographics</b>                                                                                                                                                                                                                                                                                                                                                                                                                                                                                                                                                                                                                                                                                                 |                         |                          |                      |                          |
| Age, mean (± SD)                                                                                                                                                                                                                                                                                                                                                                                                                                                                                                                                                                                                                                                                                                    | 1.00 [1.00, 1.00]       | 1.00 [1.00, 1.00]        | 1.00 [1.00, 1.00]    | 1.00 [1.00, 1.00]        |
| Male sex [REF=Female]                                                                                                                                                                                                                                                                                                                                                                                                                                                                                                                                                                                                                                                                                               | 0.97 [0.90, 1.04]       | 0.98 [0.91, 1.06]        | 0.92 [0.85, 1.00]    | 0.94 [0.86, 1.02]        |
| Income quintile [REF = 1 – low]                                                                                                                                                                                                                                                                                                                                                                                                                                                                                                                                                                                                                                                                                     | REF                     | REF                      | REF                  | REF                      |
| 2                                                                                                                                                                                                                                                                                                                                                                                                                                                                                                                                                                                                                                                                                                                   | 1.15 [1.04, 1.27]       | 1.14 [1.03, 1.26]        | 1.07 [0.96, 1.21]    | 1.06 [0.94, 1.20]        |
| 3                                                                                                                                                                                                                                                                                                                                                                                                                                                                                                                                                                                                                                                                                                                   | 1.22 [1.10, 1.35]       | 1.20 [1.08, 1.33]        | 1.17 [1.04, 1.32]    | <b>1.16 [1.03, 1.31]</b> |
| 4                                                                                                                                                                                                                                                                                                                                                                                                                                                                                                                                                                                                                                                                                                                   | 1.15 [1.04, 1.27]       | 1.11 [1.00, 1.24]        | 1.15 [1.02, 1.30]    | 1.12 [0.99, 1.27]        |
| 5                                                                                                                                                                                                                                                                                                                                                                                                                                                                                                                                                                                                                                                                                                                   | 1.30 [1.17, 1.44]       | 1.26 [1.13, 1.40]        | 1.35 [1.19, 1.53]    | <b>1.31 [1.15, 1.49]</b> |
| Calendar Year of Cohort Entry<br>[REF=2000]                                                                                                                                                                                                                                                                                                                                                                                                                                                                                                                                                                                                                                                                         | REF                     | REF                      | REF                  | REF                      |
| 2001                                                                                                                                                                                                                                                                                                                                                                                                                                                                                                                                                                                                                                                                                                                | 1.07 [0.92, 1.23]       | 1.07 [0.92, 1.24]        | 1.13 [0.96, 1.34]    | 1.13 [0.95, 1.35]        |
| 2002                                                                                                                                                                                                                                                                                                                                                                                                                                                                                                                                                                                                                                                                                                                | 1.12 [0.97, 1.30]       | 1.12 [0.96, 1.31]        | 1.12 [0.95, 1.33]    | 1.14 [0.95, 1.36]        |
| 2003                                                                                                                                                                                                                                                                                                                                                                                                                                                                                                                                                                                                                                                                                                                | 1.19 [1.02, 1.38]       | 1.22 [1.04, 1.42]        | 1.18 [0.99, 1.40]    | 1.21 [1.01, 1.44]        |
| 2004                                                                                                                                                                                                                                                                                                                                                                                                                                                                                                                                                                                                                                                                                                                | 1.01 [0.87, 1.17]       | 1.04 [0.89, 1.21]        | 0.97 [0.82, 1.15]    | 1.01 [0.84, 1.20]        |
| 2005                                                                                                                                                                                                                                                                                                                                                                                                                                                                                                                                                                                                                                                                                                                | 1.15 [1.00, 1.34]       | 1.21 [1.04, 1.41]        | 1.22 [1.02, 1.45]    | 1.30 [1.08, 1.56]        |
| 2006                                                                                                                                                                                                                                                                                                                                                                                                                                                                                                                                                                                                                                                                                                                | 1.25 [1.07, 1.45]       | 1.30 [1.11, 1.52]        | 1.28 [1.07, 1.53]    | 1.33 [1.10, 1.60]        |
| 2007                                                                                                                                                                                                                                                                                                                                                                                                                                                                                                                                                                                                                                                                                                                | 1.29 [1.11, 1.50]       | 1.37 [1.17, 1.60]        | 1.33 [1.11, 1.59]    | 1.42 [1.18, 1.72]        |
| 2008                                                                                                                                                                                                                                                                                                                                                                                                                                                                                                                                                                                                                                                                                                                | 1.26 [1.09, 1.47]       | 1.35 [1.16, 1.58]        | 1.30 [1.09, 1.55]    | 1.41 [1.17, 1.70]        |
| 2009                                                                                                                                                                                                                                                                                                                                                                                                                                                                                                                                                                                                                                                                                                                | 1.42 [1.21, 1.66]       | 1.49 [1.26, 1.76]        | 1.83 [1.51, 2.22]    | 1.96 [1.60, 2.40]        |
| <b>Co-morbidity</b>                                                                                                                                                                                                                                                                                                                                                                                                                                                                                                                                                                                                                                                                                                 |                         |                          |                      |                          |
| No. of Hopkins ADGs[REF=<5]                                                                                                                                                                                                                                                                                                                                                                                                                                                                                                                                                                                                                                                                                         | REF                     | REF                      | REF                  | REF                      |
| 5-9                                                                                                                                                                                                                                                                                                                                                                                                                                                                                                                                                                                                                                                                                                                 | 1.02 [0.94, 1.10]       | 1.03 [0.95, 1.12]        | 1.03 [0.94, 1.13]    | 1.07 [0.97, 1.18]        |
| 10+                                                                                                                                                                                                                                                                                                                                                                                                                                                                                                                                                                                                                                                                                                                 | 1.02 [0.93, 1.12]       | 1.05 [0.95, 1.16]        | 1.04 [0.93, 1.16]    | 1.09 [0.97, 1.23]        |
| Hospitalization for RA prior to<br>rheumatologist visit / end of<br>study period                                                                                                                                                                                                                                                                                                                                                                                                                                                                                                                                                                                                                                    | 0.60 [0.42, 0.85]       | 0.63 [0.44, 0.91]        | 0.51 [0.36, 0.71]    | 0.54 [0.38, 0.76]        |
| <b>Geographic</b>                                                                                                                                                                                                                                                                                                                                                                                                                                                                                                                                                                                                                                                                                                   |                         |                          |                      |                          |
| Patient rural residence<br>[REF=urban]                                                                                                                                                                                                                                                                                                                                                                                                                                                                                                                                                                                                                                                                              | 0.74 [0.68, 0.81]       | 1.00 [0.89, 1.11]        | 0.80 [0.72, 0.89]    | 1.09 [0.96, 1.24]        |
| Rheumatology supply per 100<br>000 adults                                                                                                                                                                                                                                                                                                                                                                                                                                                                                                                                                                                                                                                                           | 1.15 [1.11, 1.20]       | 1.19 [0.97, 1.45]        | 1.16 [1.11, 1.22]    | 1.25 [0.98, 1.61]        |
| Remote Distance (≥100 km to<br>rheumatologist)                                                                                                                                                                                                                                                                                                                                                                                                                                                                                                                                                                                                                                                                      | 0.28 [0.24, 0.33]       | 0.46 [0.36, 0.59]        | 0.26 [0.22, 0.31]    | 0.33 [0.26, 0.43]        |
| <b>Primary Care physician</b>                                                                                                                                                                                                                                                                                                                                                                                                                                                                                                                                                                                                                                                                                       |                         |                          |                      |                          |
| Male sex [REF=Female]                                                                                                                                                                                                                                                                                                                                                                                                                                                                                                                                                                                                                                                                                               | 0.81 [0.74, 0.89]       | 0.89 [0.81, 0.97]        | 0.81 [0.73, 0.90]    | 0.91 [0.81, 1.01]        |
| Years since graduation                                                                                                                                                                                                                                                                                                                                                                                                                                                                                                                                                                                                                                                                                              | 1.00 [0.99, 1.00]       | 0.99 [0.99, 1.00]        | 1.00 [0.99, 1.00]    | 0.99 [0.99, 1.00]        |
| Practice type††<br>[REF=fee-for-service]                                                                                                                                                                                                                                                                                                                                                                                                                                                                                                                                                                                                                                                                            |                         |                          |                      |                          |
| Capitation model                                                                                                                                                                                                                                                                                                                                                                                                                                                                                                                                                                                                                                                                                                    | 1.22 [1.01, 1.47]       | 1.13 [0.93, 1.36]        | 1.22 [0.99, 1.51]    | 1.09 [0.87, 1.35]        |
| *OR = Odds Ratio; **95% CI = 95% confidence interval †Adjusted for all covariates including: patient demographics, clinical factors, primary care physician characteristics, provider continuity, and geographic characteristics [including regional variation by regional health service planning areas Local Health Integration Networks (LHINs) not reported here.] ††Practice types: <i>blended capitation models</i> [Family Health Networks (FHNs), Family Health Organizations (FHOs), Family Health Teams (FHTs), an interprofessional team model composed of FHNs and FHOs], <i>enhanced fee-for-service models</i> [Family Health Groups (FHGs) and other groups], and traditional <i>fee-for-service</i> |                         |                          |                      |                          |

## Acknowledgements:

Financial support provided by the Canadian Institutes of Health Research (CIHR operating grant 119348). This study was also supported by the Institute for Clinical Evaluative Sciences (ICES), a non-profit research corporation funded by the Ontario Ministry of Health and Long-Term Care (MOHLTC). The opinions, results and conclusions are those of the authors and are independent from the funding sources. No endorsement by ICES or the Ontario MOHLTC is intended or should be inferred.

This study was performed in the context on the Ontario Best Practices Research Initiative (OBRI), a unique collaboration of rheumatologists, primary care physicians, researchers, patients and other stakeholders seeking to improve the quality of care and clinical outcomes of patients with arthritis across the spectrum of care.

Dr. Tu holds a CIHR Fellowship Award in Primary Care Research (2011-2013). Dr. Ivers holds a CIHR Fellowship Award in Clinical Research and a Fellowship Award from the Department of Family and Community Medicine, University of Toronto. Dr. Bombardier holds a Canada Research Chair in Knowledge Transfer for Musculoskeletal Care (2002-2016) and a Pfizer Research Chair in Rheumatology.

## Contributorship Statement

All authors contributed substantially to conception and design, or acquisition of data, or analysis and interpretation of data and were involved in drafting the article and gave final approval of the version to be published.

## Competing Interests

None

## Data Sharing Statement

There are no additional unpublished data other than that presented in the manuscript. Questions regarding the data presented in the manuscript can be directed to the corresponding author.

## REFERENCES

1. Pincus T. Rheumatoid arthritis: a medical emergency? *Scand J Rheumatol Suppl* 1994;**100**:21-30
2. Moreland LW, Bridges SL, Jr. Early rheumatoid arthritis: a medical emergency? *Am J Med* 2001;**111**(6):498-500 doi: S0002-9343(01)00973-1 [pii][published Online First: Epub Date]].
3. Emery P, Breedveld FC, Dougados M, et al. Early referral recommendation for newly diagnosed rheumatoid arthritis: evidence based development of a clinical guide. *Ann Rheum Dis* 2002;**61**(4):290-7
4. Combe B, Landewe R, Lukas C, et al. EULAR recommendations for the management of early arthritis: report of a task force of the European Standing Committee for International Clinical Studies Including Therapeutics (ESCISIT). *Ann Rheum Dis* 2007;**66**(1):34-45 doi: ard.2005.044354 [pii] 10.1136/ard.2005.044354[published Online First: Epub Date]].
5. Bykerk V. Canadian Consensus Statement on Early Optimal Therapy in Early Rheumatoid Arthritis. *The Journal of the Canadian Rheumatology Association* 2004
6. Widdifield J, Bernatsky S, Paterson JM, et al. Quality care in seniors with new-onset rheumatoid arthritis: a Canadian perspective. *Arthritis Care Res (Hoboken)* 2011;**63**(1):53-7 doi: 10.1002/acr.20304[published Online First: Epub Date]].
7. Nell VP, Machold KP, Eberl G, et al. Benefit of very early referral and very early therapy with disease-modifying anti-rheumatic drugs in patients with early rheumatoid arthritis. *Rheumatology (Oxford)* 2004;**43**(7):906-14 doi: 10.1093/rheumatology/keh199 keh199 [pii][published Online First: Epub Date]].
8. Kyburz D, Gabay C, Michel BA, et al. The long-term impact of early treatment of rheumatoid arthritis on radiographic progression: a population-based cohort study. *Rheumatology (Oxford)* 2011;**50**(6):1106-10 doi: keq424 [pii] 10.1093/rheumatology/keq424[published Online First: Epub Date]].
9. Feldman DE, Bernatsky S, Houde M, et al. Early consultation with a rheumatologist for RA: does it reduce subsequent use of orthopaedic surgery? *Rheumatology (Oxford)* 2012 doi: kes231 [pii] 10.1093/rheumatology/kes231[published Online First: Epub Date]].
10. van Nies JA, Krabben A, Schoones JW, et al. What is the evidence for the presence of a therapeutic window of opportunity in rheumatoid arthritis? A systematic literature review. *Ann Rheum Dis* 2013 doi: annrheumdis-2012-203130 [pii] 10.1136/annrheumdis-2012-203130[published Online First: Epub Date]].
11. Mierau M, Schoels M, Gonda G, et al. . Assessing remission in clinical practice. . *Rheumatology (Oxford)* 2007;**46**:975-9
12. Emery P, Breedveld F, Hall S, et al. Comparison of methotrexate monotherapy with a combination of methotrexate and etanercept in active, early, moderate to severe rheumatoid arthritis (COMET): a randomised, double-blind, parallel treatment trial. . *Lancet* 2008;**372**:375-82.
13. Emery P, Salmon M. Early rheumatoid arthritis: time to aim for remission? . *Ann Rheum Dis* 1995;**54**:944-7
14. Sokka T, Hetland M, Mäkinen H, et al. Remission and rheumatoid arthritis: Data on patients receiving usual care in twenty-four countries. . *Arthritis Rheum* 2008;**58**:2642-51
15. Boers M. Understanding the window of opportunity concept in early rheumatoid arthritis. *Arthritis Rheum* 2003;**48**(7):1771-4 doi: 10.1002/art.11156[published Online First: Epub Date]].
16. Li LC, Badley EM, MacKay C, et al. An evidence-informed, integrated framework for rheumatoid arthritis care. *Arthritis Rheum* 2008;**59**(8):1171-83 doi: 10.1002/art.23931[published Online First: Epub Date]].

17. Kralj B, Kantarevic J. Primary Care in Ontario: reforms, investments and achievements. Ontario Medical Review Available online:  
[https://www.oma.org/Resources/Documents/PrimaryCareFeaturepdf 2012](https://www.oma.org/Resources/Documents/PrimaryCareFeaturepdf%2012)
18. Widdifield J, Paterson JM, Bernatsky S, et al. The Rising Burden of Rheumatoid Arthritis Surpasses Rheumatology Supply in Ontario. *Canadian Journal of Public Health* 2013;[in press]
19. Tepper J, Schultz S, Rothwell D, et al. Physician services in rural and Northern Ontario. . ICES investigative report. Toronto (ON): Institute for Clinical Evaluative Sciences, 2005.
20. Widdifield J, Bombardier C, Bernatsky S, et al. Accuracy of Canadian Health Administrative Databases for identifying Patients with Rheumatoid Arthritis: A validation study using the Medical Records of Primary Care Physicians. 2012 ACR Annual Scientific Meeting [Abstract #926]. *Arthritis Care and Research* 2012
21. Widdifield J, Bernatsky S, Paterson JM, et al. Accuracy of Canadian health administrative databases in identifying patients with rheumatoid arthritis: a validation study using the medical records of rheumatologists. *Arthritis Care Res (Hoboken)* 2013;**65**(10):1582-91 doi: 10.1002/acr.22031[published Online First: Epub Date]].
22. Chan B, Schultz S. Supply and utilization of general practitioner and family physician services in Ontario. Toronto, ON: Institute for Clinical Evaluative Sciences, 2005.
23. Improving health care data in Ontario. ICES Investigative Report. Toronto: Institute for Clinical Evaluative Sciences, 2005.
24. The Johns Hopkins Adjusted Clinical Group (ACG) Case-Mix System.  
Available at: <http://acg.jhsph.edu>. Secondary The Johns Hopkins Adjusted Clinical Group (ACG) Case-Mix System.  
Available at: <http://acg.jhsph.edu>.
25. Starfield B. Primary Care: Balancing Health Needs, Services and Technology. New York: Oxford University Press, 1998:35–54.
26. Ministry of Health and Long-Term Care M. Local Health Integration Networks. Secondary Local Health Integration Networks 2006. <http://www.lhins.on.ca/>.
27. Ministry of Health and Long-Term Care M. Health Force Ontario: Family Practice Models. Secondary Health Force Ontario: Family Practice Models 2013.  
[http://www.healthforceontario.ca/en/Home/Physicians/Training\\_%7C\\_Practising\\_in\\_Ontario/Physician\\_Roles/Family\\_Practice\\_Models](http://www.healthforceontario.ca/en/Home/Physicians/Training_%7C_Practising_in_Ontario/Physician_Roles/Family_Practice_Models).
28. Glazier R, Zagorski B, Rayner J. Comparison of Primary Care Models in Ontario by Demographics, Case Mix and Emergency Department Use, 2008/09 to 2009/10. ICES Investigative Report Toronto: Institute for Clinical Evaluative Sciences, 2012.
29. Lacaille D, Anis A, Guh D, et al. Gaps in care for rheumatoid arthritis: a population study. *Arthritis Rheum* 2005;**53**(2):241-8
30. Feldman DE, Bernatsky S, Haggerty J, et al. Delay in consultation with specialists for persons with suspected new-onset rheumatoid arthritis: a population-based study. *Arthritis Rheum* 2007;**57**(8):1419-25 doi: 10.1002/art.23086[published Online First: Epub Date]].
31. van der Linden MP, le Cessie S, Raza K, et al. Long-term impact of delay in assessment of patients with early arthritis. *Arthritis Rheum* 2010;**62**(12):3537-46 doi: 10.1002/art.27692[published Online First: Epub Date]].
32. Visser H, le Cessie S, Vos K, et al. How to diagnose rheumatoid arthritis early: a prediction model for persistent (erosive) arthritis. *Arthritis Rheum* 2002;**46**(2):357-65 doi: 10.1002/art.10117 [pii][published Online First: Epub Date]].
33. Puolakka K, Kautiainen H, Mottonen T, et al. Impact of initial aggressive drug treatment with a combination of disease-modifying antirheumatic drugs on the development of work disability in early rheumatoid arthritis: a five-year randomized followup trial. *Arthritis Rheum* 2004;**50**(1):55-62 doi: 10.1002/art.11436[published Online First: Epub Date]].

- 1  
2  
3  
4  
5  
6  
7  
8  
9  
10  
11  
12  
13  
14  
15  
16  
17  
18  
19  
20  
21  
22  
23  
24  
25  
26  
27  
28  
29  
30  
31  
32  
33  
34  
35  
36  
37  
38  
39  
40  
41  
42  
43  
44  
45  
46  
47  
48  
49  
50  
51  
52  
53  
54  
55  
56  
57  
58  
59  
60
34. Bombardier C, Hawker G, Mosher D. The Impact of Arthritis in Canada: Today and Over the Next 30 Years. Arthritis Alliance of Canada, 2011.
35. Gabriel S, Wagner J, Zinsmeister A, et al. Is rheumatoid arthritis care more costly when provided by rheumatologists compared with generalists? *Arthritis Rheum* 2001;**44**(7):1504-14
36. Widdifield J, Paterson JM, Bernatsky S, et al. Epidemiology of Rheumatoid Arthritis in Ontario, Canada. *Arthritis & Rheumatism* 2013;[in press]
37. Glazier R, Gozdyra P, Yeritsyan N. Geographic Access to Primary Care and Hospital Services for Rural and Northern Communities. Toronto, Ontario: Institute for Clinical Evaluative Sciences, 2011.
38. Hawker G, Badley E, Jaglal S, et al. Project for an Ontario Women's Health Evidence-Based Report: Musculoskeletal Conditions. In: Bierman A, ed. Toronto, 2010.
39. Badley E, Veinot P, Ansari H, et al. Arthritis Community Research and Evaluation Unit 2007 survey of rheumatologists in Ontario. <http://www.acreu.ca/pdf/pub5/08-03.pdf>. 2008
40. Meeuwesen L, Schapp C, Van der Staak C. Verbal analysis of doctor-patient communication. *Soc Sci Med* 1991;**32**(1143)
41. Bensing JM, van den Brink-Muinen A, de Bakker DH. Gender differences in practice style: a Dutch study of general practitioners. *Med Care* 1993;**31**(3):219-29
42. Bertakis K, Helms L, Callahan E, et al. The influence of gender on physician practice style. *Med Care* 1995;**33**:407-16
43. Hall JA, Blanch-Hartigan D, Roter DL. Patients' satisfaction with male versus female physicians: a meta-analysis. *Med Care* 2011;**49**(7):611-7 doi: 10.1097/MLR.0b013e318213c03f[published Online First: Epub Date].
44. Jamal S, Alibhai SM, Badley EM, et al. Time to treatment for new patients with rheumatoid arthritis in a major metropolitan city. *J Rheumatol* 2011;**38**(7):1282-8 doi: jrheum.101315 [pii] 10.3899/jrheum.101315[published Online First: Epub Date].

## TITLE PAGE

**TITLE:** Access to rheumatologists among patients with newly diagnosed rheumatoid arthritis in a Canadian universal public health care system.

**Jessica Widdifield**<sup>1,2</sup> BSc, PhD; **J. Michael Paterson**<sup>1,2,3</sup> MSc; **Sasha Bernatsky**<sup>4</sup> MD, FRCPC, PhD; **Karen Tu**<sup>1,2</sup> MD, MSc; **J. Carter Thorne**<sup>5</sup> MD, FRCPC; **Noah Ivers**<sup>1,2,6</sup> MD, PhD(c); **Debra Butt**<sup>1</sup>, MD, MSc; **R. Liisa Jaakkimainen**<sup>1,2,7</sup> MD, MSc; **Nadia Gunraj**<sup>2</sup> BSc, MPH; **Vandana Ahluwalia**<sup>8,7</sup> MD, FRCPC; **Claire Bombardier**<sup>1</sup>, MD, MSc, FRCPC.

**Affiliations:**

1. *University of Toronto, Toronto, ON;*
2. *Institute for Clinical Evaluative Sciences, Toronto, ON;*
3. *McMaster University, Hamilton, ON;*
4. *McGill University, Montreal, QC;*
5. *Southlake Regional Health Centre, Newmarket, ON;*
6. *Women's College Hospital, Toronto, ON;*
- 6-7. *Sunnybrook Health Sciences Centre, Toronto, ON;*
- 7-8. *William Osler Health Center, Brampton, ON;*

**Correspondence to:**

Jessica Widdifield

200 Elizabeth St 13EN-224 Toronto ON M5G 2C4 CANADA

Tel: 416-340-4856 / Fax: 416-340-4814 / E-mail: [jessica.widdifield@utoronto.ca](mailto:jessica.widdifield@utoronto.ca)**Abstract word count:** 247**Manuscript word count:** ~~2568~~ 2672 (excluding abstract)**No. of Pages:** 20**No. of Figures:** 2**No. of Tables:** 3**Key words:** Rheumatoid arthritis, quality of care, access to care



**ABSTRACT**

Our objective was to estimate the percent of incident rheumatoid arthritis (RA) patients who saw a rheumatologist within 3, 6 and 12 months of suspected diagnosis by a family physician, and assess what factors may influence the time frame with which patients are seen.

**Methods:**

Over 2000-2009, we studied incident RA patients who were initially diagnosed by a family physician. We assessed secular trends in rheumatology encounters and differences between patients who saw vs. did not see a rheumatologist. We performed hierarchical logistic regression analyses to determine whether receipt of rheumatology care was associated with patient, primary care physician, and geographic factors.

**Results:**

Among 19,760 incident RA patients, 59%, 75% and 84% of patients saw a rheumatologist within 3, 6 and 12 months, respectively. The prevalence of initial consultations within 3 months did not increase over time, however, access within 6 and 12 months increased over time. Factors positively associated with timely consultations included higher regional rheumatology supply [adjusted Odds Ratio, aOR 1.35(95% CI 1.13,1.60)] and higher patient socioeconomic status [aOR 1.18(95%CI 1.07,1.30)]. Conversely, factors inversely associated with timely consultations included remote patient residence [aOR 0.51(95% CI 0.41,0.64)], and male family physicians [aOR 0.88(95% CI 0.81,0.95)].

**Conclusion:**

Increasing access to rheumatologists within 6 and 12 months occurred over time, however consultations within 3 months did not change over time. Measures of poor access (such as proximity to and density of rheumatologists) were negatively associated with timely consultations. Additional factors that contributed to disparities in access included patient socioeconomic status and physician sex.

N=247252



**Article focus:**

- In a large population-based cohort of patients with newly diagnosed rheumatoid arthritis (RA) in Canada, our study's aim was to determine the percent of incident RA patients who saw a rheumatologist within 3, 6 and 12 months of suspected diagnosis by a family physician, and assessed what factors may influence the time frame with which patients are seen.

**Key messages:**

- We found increasing access to rheumatologists within 6 and 12 months have occurred over time, however consultations within 3 months did not change over time.
- Overall, 41% of patients are still not seen within 3 months of a primary care diagnosis as recommended by current guidelines. Thus, an important proportion of patients are not receiving optimal care. However, we ~~only~~ studied only a proportion of the total delay from the onset of the patients' symptoms to rheumatology care. It is unknown how long patients have symptoms before seeking medical care, or remain in primary care before their RA is recognized. Therefore the delays between onset of symptoms to rheumatology care may be larger than reported here.
- Measures of poor access (such as proximity to and density of rheumatologists) were negatively associated with timely consultations. Additional factors that contributed to disparities in access included patient socioeconomic status and physician sex. Strategies to facilitate more timely access, such as improving proximity to and density of rheumatologists along with family physician education on initiating more timely referrals, are acutely needed.

**Strengths and limitations of this study:**

- Strengths of our study include its large sample and the use of a validated population-based RA cohort.
- Our main limitation is that our cohort definition requires patients whose family physician strongly suspects that the patient has RA, thus, our analyses are likely restricted to patients with a more homogeneous clinical presentation (such as rheumatoid factor positive patients) or those with more active disease.

1  
2  
3  
4  
5  
6  
7  
8  
9  
10 Rheumatoid arthritis (RA) is a progressive inflammatory arthritis associated with joint damage and  
11 functional deterioration, work disability and premature mortality.[1] At disease onset, RA is considered  
12 an urgent medical condition[1 2] requiring prompt referral to a rheumatologist.[3-5] Timely  
13 rheumatology care is important as it increases early exposure to treatment,[6] improves patient  
14 outcomes,[7][8] decreases the need for costly surgical interventions,[9] and thus reduces the global  
15 disease burden. Furthermore, the sooner a patient is seen and managed by rheumatologists results in  
16 superior clinical responses and increases the chance of disease remission[10][11][12][13][14] than if  
17 the same care is administered later in the disease course.[15]

18  
19  
20  
21  
22  
23  
24  
25  
26  
27 In Canada, access to specialists often depends on referral by a family physician. For optimal RA care  
28 to occur, a patient must seek care by a family physician, who, in turn, must suspect RA and initiate  
29 referral to a rheumatologist, who will undertake the appropriate diagnostic tests and initiate early  
30 treatment.[16] Delays that occur at any of these stages prevent patients from receiving timely care.

31  
32  
33  
34  
35  
36 Ontario has approximately 13 million residents and 10,000 family physicians.[17] There are  
37 approximately 150 rheumatologists (1.5 rheumatologists per 100,000 population), however, they are  
38 concentrated most heavily in southern Ontario[18], which may be a potential barrier to equitable,  
39 timely rheumatology care.[19] Accordingly, we set out to determine the percent of incident RA patients  
40 who saw a rheumatologist within 3, 6 and 12 months of suspected diagnosis by a family physician, and  
41 assessed what factors may influence the time frame with which patients are seen.

#### 42 43 44 45 46 47 48 **SUBJECTS AND METHODS:**

49  
50  
51 **Setting and Design.** We performed a retrospective, population-based cohort study of newly diagnosed  
52 RA patients within Ontario, in which all residents are covered by universal public health insurance for  
53  
54

1  
2  
3  
4  
5  
6  
7  
8 physician and hospital services. The study was approved by the Research Ethics Board at Sunnybrook  
9 Health Sciences Centre, Toronto, Canada.

10  
11  
12  
13 **Data sources.** We used the Ontario Rheumatoid Arthritis administrative Database (ORAD), a  
14 population-based RA cohort generated from [health](#) administrative databases using a validated case  
15 definition. RA patients are included in ORAD if they have 3 Ontario Health Insurance (OHIP)  
16 physician service claims over a two-year period in which RA is the recorded diagnosis, with at least 1  
17 of these claims made by a musculoskeletal specialist. ORAD has been validated and shown to have a  
18 high sensitivity (78%), specificity (100%), and positive predictive value (78%) for identifying RA  
19 patients based on medical record reviews.[20][21] Validation of RA onset within administrative data  
20 has also shown to be highly accurate.[21] Records for individuals in ORAD are also linked to the  
21 following administrative datasets. The Ontario Registered Persons Database was used to identify  
22 demographic information on age, sex, place of residence, death, and emigration. Physician specialty  
23 was obtained by linking the Institute for Clinical Evaluative Sciences ([ICES](#)) Physician Database with  
24 the OHIP database.[22] We used the Client Agency Program Enrolment Database to identify the  
25 primary care delivery model of the family physician at the time the patient entered the cohort. These  
26 datasets are linked in an anonymous fashion using encrypted health insurance numbers for residents  
27 and encrypted license numbers for physicians, and they have very little missing information.[23]  
28  
29  
30  
31  
32  
33  
34  
35  
36  
37  
38  
39  
40  
41  
42

43 **Cohort definition.** We identified all incident RA patients from April 1, 2000 to March 31, 2010.  
44 Analyses were restricted to patients whose initial RA diagnosis codes were assigned by a family  
45 physician in an outpatient setting. Cohort entry (suspected RA diagnosis date) was the date of the first  
46 RA diagnosis code, and patients were followed up until one year or until outmigration, death, or the  
47 end of study period.  
48  
49  
50  
51  
52  
53  
54  
55  
56  
57  
58  
59  
60

1  
2  
3  
4  
5  
6  
7  
8 **Covariate information.** Covariates for patient demographics included age, sex, socioeconomic status  
9 (SES), and year of suspected diagnosis. SES was defined as the patient's neighbourhood median  
10 household income quintile from the Statistics Canada Census. We also identified whether patients were  
11 subsequently admitted to hospital with an RA diagnosis following a primary care diagnosis, as patients  
12 who are seen in a hospital setting for their RA may have poorer access to health care providers and/or  
13 more severe disease. As a measure of co-morbidity, we used the Johns Hopkins Adjusted Diagnostic  
14 Groups (ADG) Case-Mix System derived from both outpatient and inpatient data in the two years  
15 preceding cohort entry.[24] We categorized ADGs into low (<5), moderate (5-9), and high co-  
16 morbidity (10+). We chose this risk adjustment method as patients using the most health care resources  
17 are not typically those with single diseases but rather those with multiple and sometimes unrelated  
18 conditions. This clustering of morbidity can be a better predictor of health care use than the presence of  
19 specific diseases.[25] Geographic characteristics included patient residence, regional health service  
20 planning areas (Local Health Integration Networks, LHINs[26]), rheumatology supply and distance to  
21 the closest rheumatologist. Rurality was based upon each patient's postal code and a community  
22 population size of less than 10,000. Rheumatology supply was defined as the number of  
23 rheumatologists per 100,000 adults in the planning area (LHIN) of patient residence, and distance to  
24 the closest rheumatologist was the linear distance from the centre of patient's postal code area to that of  
25 the closest rheumatologist, with 'remote residence' defined as 100 or more kilometers (km) to the  
26 nearest rheumatologist. Family physician characteristics included sex, years since graduation (as a  
27 proxy for experience), and type of primary care delivery model the family physician was working in at  
28 the time of patient's cohort entry. We categorized each practice type as (1) *blended capitation models*  
29 [Family Health Networks (FHNs), Family Health Organizations (FHOs), Family Health Teams  
30 (FHTs)], and (2) *enhanced fee-for-service models* (Family Health Groups or FHGs) and other groups  
31 and *traditional fee-for-service practitioners*. [27] The main difference between the models is how  
32 physicians are reimbursed (e.g., through age-and-sex-adjusted capitation payments versus being paid  
33  
34  
35  
36  
37  
38  
39  
40  
41  
42  
43  
44  
45  
46  
47  
48  
49  
50  
51  
52  
53  
54

1  
2  
3  
4  
5  
6  
7  
8 on a per visit basis). Capitation models often include interdisciplinary teams involving allied healthcare  
9 providers and require physicians to maintain a list or 'roster' of enrolled patients to whom they are  
10 committed to providing primary care.[28] Including primary care model type enabled us to explore if  
11 there was an effect regarding different primary care practice models and/or how the physicians are paid  
12 as a facilitator to timely rheumatology care.  
13  
14  
15  
16

17  
18  
19 **Outcome Measurements.** We followed incident patients, determining whether they had a visit to a  
20 rheumatologist at three, six and 12 months.  
21  
22

23  
24  
25 **Statistical analysis.** Descriptive statistics were used to characterize the study population. We assessed  
26 secular trends (as the percentage of each annual incident RA cohort who saw a rheumatologist within  
27 each time period) and differences among patients who received vs. did not receive rheumatology care.  
28 We performed hierarchical logistic regression analyses to determine whether receipt of rheumatology  
29 care was associated with patient demographics, co-morbidity, geographic characteristics, and family  
30 physician characteristics. Crude and adjusted odds ratio (aOR) estimates with 95% confidence  
31 intervals (CIs) were generated. Separate analyses were performed for each outcome end date  
32 (benchmarks): three, six and 12 months.  
33  
34  
35  
36  
37  
38  
39

40  
41 All analyses were performed at the ICES on anonymized data using SAS version 9.2 (SAS Institute,  
42 Cary, North Carolina).  
43  
44  
45

## 46 47 **RESULTS:**

48  
49 Between 2000 and 2009, we identified 19,670 incident RA patients (figure 1). Overall, the mean  
50 (standard deviation, SD) age at time of cohort entry was 54 (16) years, 71% were female, 16% resided  
51 in rural areas and 5% resided in areas remote ( $\geq 100$  km) from the nearest rheumatologist (table 1).  
52  
53  
54

1  
2  
3  
4  
5  
6  
7  
8 Most patients were seen by male family physicians (70%). Few (5%) physicians were practicing under  
9 a newer capitation model.  
10

11  
12  
13 Over one year of follow-up, the average time from the first RA diagnosis code to first rheumatologist  
14 visit was 77 days (table 1). Over\_all, 59%, 75% and 84% of patients saw a rheumatologist within 3, 6  
15 and 12 months, respectively. The prevalence of initial rheumatology encounters within 3 months did  
16 not increase over the study period. However, the percentage of patients who saw a rheumatologist  
17 within 6 and 12 months increased gradually over\_time, from 72% and 81% in 2000 to 81% and 89% in  
18 2009, respectively (figure 2).  
19  
20  
21  
22  
23  
24  
25

26 Table 2 compares the characteristics of patients who saw vs. did not see a rheumatologist within 3  
27 months of cohort entry. More patients who were not seen by a rheumatologist lived in a rural area (19%  
28 vs 14%) and remote areas.  
29  
30  
31  
32  
33

34 Independent determinants of receiving rheumatology care within 3 months of RA diagnosis are  
35 reported in Table 2. Factors associated with prompt rheumatology care included increasing  
36 rheumatology supply [aOR 1.35 (95% CI 1.13,1.60)] and higher\_patient SES [aOR 1.18 (95% CI  
37 1.07,1.30)]. The strongest independent factor negatively associated with lower frequency of  
38 rheumatology visits was for patients who lived at remote distances to rheumatologists [aOR 0.51 (95%  
39 CI 0.41,0.64)]. The likelihood of not having prompt rheumatology consultations was also reduced for  
40 patients of male family physicians [aOR 0.87 (95% CI 0.81,0.95)]. There was no calendar-year effect  
41 illustrating an increasing likelihood of seeing a rheumatologist within 3 months over\_time. However,  
42 improvements over\_time were demonstrated for patients being seen by a rheumatologist within 6 and  
43 12 months (table 3).  
44  
45  
46  
47  
48  
49  
50  
51  
52  
53  
54  
55  
56  
57  
58  
59  
60

1  
2  
3  
4  
5  
6  
7  
8 We observed similar associations when we studied the effects of factors on the odds of receiving  
9 rheumatology care within 6 and 12 months (table 3). The effect of proximity on access became stronger  
10 as the time to rheumatology visit was lengthened: 6 months, aOR 0.56 (95% CI 0.36,0.59); 12 months,  
11 aOR 0.33 (95% CI 0.26,0.43). Patients who were hospitalized for RA subsequent to an initial  
12 diagnosis in an outpatient primary care setting were almost half as likely to been seen by a  
13 rheumatologist at 6 and 12 months.  
14  
15  
16  
17  
18  
19  
20  
21

## 22 Discussion

23  
24 In a publicly-funded universal healthcare system, we studied trends in encounters with rheumatologists  
25 over the past decade and observed increasing rates of access to rheumatologists within 6 months and 12  
26 months after diagnosis by a family physician. However, no such improvements were observed among  
27 patients seen within 3 months, a more favorable benchmark. We also explored whether receipt of  
28 rheumatology care was associated with patient and family physician characteristics, and measures of  
29 rheumatology supply. We found that patients of higher SES were more likely to receive timely  
30 rheumatology care, which has also been demonstrated in other Canadian provinces.[29][30] Further,  
31 proximity to and density of rheumatologists were important determinants of timely rheumatology care.  
32  
33  
34  
35  
36  
37  
38  
39

40 While our results appear encouraging, 41% of patients are still not seen within 3 months of a primary  
41 care diagnosis as recommended by current guidelines. Thus, an important proportion of patients are  
42 not receiving optimal care. When interpreting the results it is important to recognize that the delay in  
43 rheumatology consultation being studied represents only a proportion of the total delay from the onset  
44 of the patients' symptoms. While a previous study reported that the patient delay is very small relative  
45 to the family physician delay[31], in our study, i—It is unknown how long patients have symptoms  
46 before seeking medical care, or remain in primary care before their RA is recognized. Therefore the  
47  
48  
49  
50  
51  
52  
53  
54



1  
2  
3  
4  
5  
6  
7  
8 delays between onset of symptoms to rheumatology care may be larger than reported here. Conversely,  
9 we are also unaware of the disease activity and functional status of the subgroup of patients who do not  
10 receive timely rheumatology care within three months. Recent data from a large early arthritis clinic  
11 indicated that 60% of patients had self-limited symptoms.[32] Therefore, a delay of three months in  
12 receipt of rheumatology care may not always be as deleterious to the likelihood of a good response or  
13 remission.[33]  
14  
15  
16  
17  
18  
19

20  
21 Given the high economic impact of RA[34], rheumatologists are key to an integrated healthcare  
22 delivery system.[35] However, not all patients are receiving the right care at the right time. Delays in  
23 timely consultations may reflect the growing burden of RA relative to rheumatology supply. During  
24 our study period, the number of rheumatologists in Ontario remained relatively stable (1.5  
25 rheumatologists per 100,000 population).[18 36] While most RA patients were seen by a  
26 rheumatologist within 1 year, delays in more timely benchmarks may also be indicative of the need to  
27 educate primary care physicians to initiate rheumatology referrals sooner. Ultimately, delays in access  
28 to timely, quality care and treatment result in increasing disability for RA patients as well as increasing  
29 costs to the healthcare system.[34]  
30  
31  
32  
33  
34  
35  
36  
37  
38  
39

40 Geographic variation in receipt of timely rheumatology care may be indicative of problems with  
41 access. Considering the geographic size and features of Ontario, approximately one-quarter of  
42 Ontarians resides in communities with 30,000 or fewer residents.[37] However, few rheumatologists  
43 practice in rural communities.[18] Consequently, the threshold for referral to rheumatologists may be  
44 higher in remote versus urban communities (i.e., rural patients who are referred have substantially more  
45 active disease than their urban counterparts).[36][6] Thus, there is a need to address the low  
46 rheumatology supply among remote communities.  
47  
48  
49  
50  
51  
52  
53  
54  
55  
56  
57  
58  
59  
60

1  
2  
3  
4  
5  
6  
7  
8 Additionally, there was a low likelihood of being seen by a rheumatologist within 6 or 12 months  
9 subsequent to a hospital encounter for RA after a patient was initially diagnosed in a primary care  
10 setting. In areas with few rheumatologists, family physicians may have no choice but to encourage  
11 patients to seek hospital-based specialty care. In addition, while most rheumatologists have a hospital  
12 appointment, not all hospitals have rheumatologists.[38] Thus, our findings reinforce the need for  
13 strategies to not only improve access to rheumatologists but also to encourage proper follow-up for  
14 these patients.  
15  
16  
17  
18  
19  
20  
21  
22

23 Our results showed that patients of female family physicians were more likely to receive rheumatology  
24 care earlier. While there is conflicting data on the influence of physician gender on practice  
25 styles,[39][40] female physicians have been shown to engage in more preventive services and to  
26 communicate differently with their patients.[41] Male physicians may have more confidence in  
27 managing RA in primary care, such as starting glucocorticoids prior to rheumatology encounters.  
28 Similarly, patients have also reported to have more confidence in male physicians[42] and thus may be  
29 more hesitant to seek secondary care. Together, this may explain why RA patients of female family  
30 physicians are more likely to be seen by rheumatologists earlier and that the influence of physician  
31 gender was attenuated at 1-year post-initial RA diagnosis.  
32  
33  
34  
35  
36  
37  
38  
39  
40

41 We also sought to evaluate the influence of primary care models on rheumatology encounters. We  
42 hypothesized that patients of capitation models, which involve interdisciplinary teams, allied health  
43 providers and where patient enrollment is most strongly encouraged, could improve continuity of care  
44 with their patients that could ultimately affect the quality of care that these patients receive. While we  
45 found no association, it may be too soon to determine an effect as many physicians changed models  
46 over time and few physicians were practicing under a capitation model during the study period.[43]  
47  
48  
49  
50  
51  
52  
53  
54

1  
2  
3  
4  
5  
6  
7  
8 Strengths of our study include its large sample and the use of a validated population-based RA  
9 cohort.[21] Our main limitation is that our cohort definition requires patients to have had their first RA  
10 diagnosis code provided by a family physician (i.e. those whose physician strongly suspects that the  
11 patient has RA). While others have used this approach,[9] our analyses are likely restricted to patients  
12 with a more homogeneous clinical presentation (such as rheumatoid factor positive patients) or those  
13 with more active disease in which the family physician was able to accurately diagnose the condition  
14 and/or more likely to use an RA billing code as a reason for visit. Therefore we may be over-estimating  
15 the proportion of patients with timely rheumatology encounters. These related caveats are owing to the  
16 absence of both symptom onset and date of referral in [health](#) administrative databases. Future research  
17 is required to develop and validate algorithms to better predict RA onset from administrative data.  
18 However, previous researchers have also used physician service claims to sample RA patients from  
19 rheumatology practices in order to calculate wait times on a smaller scale, and these studies may be  
20 subjected to similar biases (inclusion of early RA patients with a more homogenous clinical  
21 presentation).[9][44]

22  
23  
24  
25  
26  
27  
28  
29  
30  
31  
32  
33  
34  
35  
36 In conclusion, we found increasing access to rheumatologists within 6 and 12 months over\_time,  
37 however rheumatology encounters within 3 months did not change over\_time. Measures of poor access  
38 negatively impacted rates of encounters with a rheumatologist. Factors that contributed to disparities in  
39 rheumatology access included SES and physician sex. Strategies to facilitate more timely access, such  
40 as improving proximity to and density of rheumatologists along with family physician education on  
41 initiating more timely referrals, are acutely needed.  
42  
43  
44  
45  
46  
47  
48  
49  
50  
51  
52  
53  
54

1  
2  
3  
4  
5  
6  
7  
8  
9  
10  
11  
12  
13  
14  
15  
16  
17  
18  
19  
20  
21  
22  
23  
24  
25  
26  
27  
28  
29  
30  
31  
32  
33  
34  
35  
36  
37  
38  
39  
40  
41  
42  
43  
44  
45  
46  
47  
48  
49  
50  
51  
52  
53  
54  
55  
56  
57  
58  
59  
60

**Acknowledgements:**

Financial support provided by the Canadian Institutes of Health Research (CIHR operating grant 119348). This study was also supported by the Institute for Clinical Evaluative Sciences (ICES), a non-profit research corporation funded by the Ontario Ministry of Health and Long-Term Care (MOHLTC). The opinions, results and conclusions are those of the authors and are independent from the funding sources. No endorsement by ICES or the Ontario MOHLTC is intended or should be inferred.

This study was performed in the context on the Ontario Best Practices Research Initiative (OBRI), a unique collaboration of rheumatologists, primary care physicians, researchers, patients and other stakeholders seeking to improve the quality of care and clinical outcomes of patients with arthritis across the spectrum of care.

Dr. Tu holds a CIHR Fellowship Award in Primary Care Research (2011-2013). Dr. Ivers holds a CIHR Fellowship Award in Clinical Research and a Fellowship Award from the Department of Family and Community Medicine, University of Toronto. Dr. Bombardier holds a Canada Research Chair in Knowledge Transfer for Musculoskeletal Care (2002-2016) and a Pfizer Research Chair in Rheumatology.

Figure 1. Flow diagram of selection of study participants

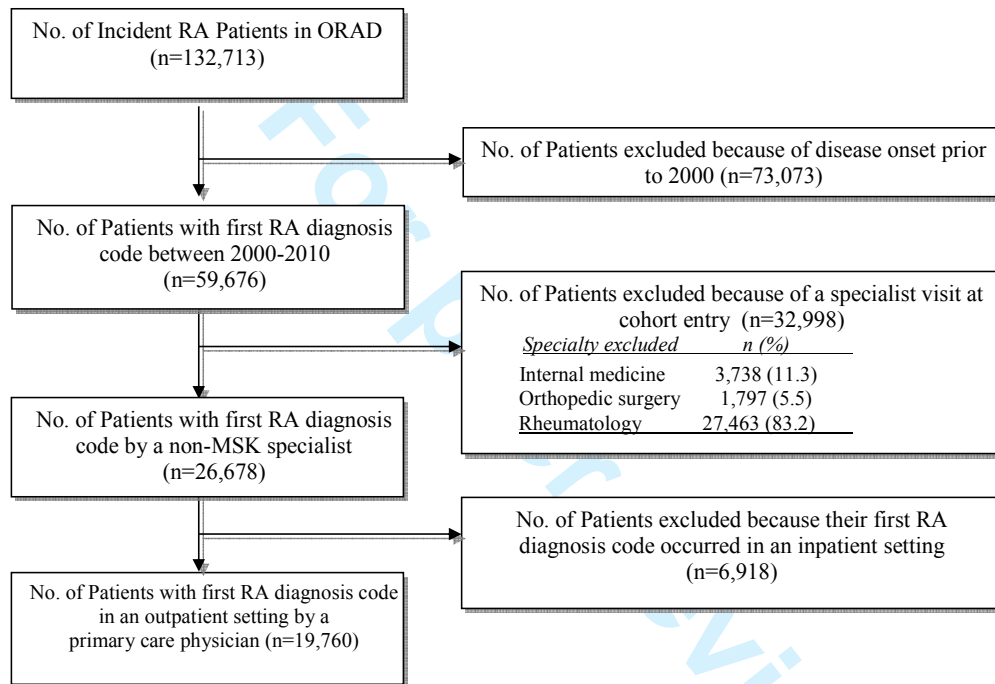

1  
2  
3  
4  
5  
6  
7  
8  
9  
10  
11  
12  
13  
14  
15  
16  
17  
18  
19  
20  
21  
22  
23  
24  
25  
26  
27  
28  
29  
30  
31  
32  
33  
34  
35  
36  
37  
38  
39  
40  
41  
42  
43  
44  
45  
46  
47  
48  
49  
50  
51  
52  
53  
54  
55  
56  
57  
58  
59  
60

**Figure 2: Percentage of patients with newly diagnosed RA who are seen by a rheumatologist within 3, 6 and 12 months of suspected diagnosis by a primary care physician.**

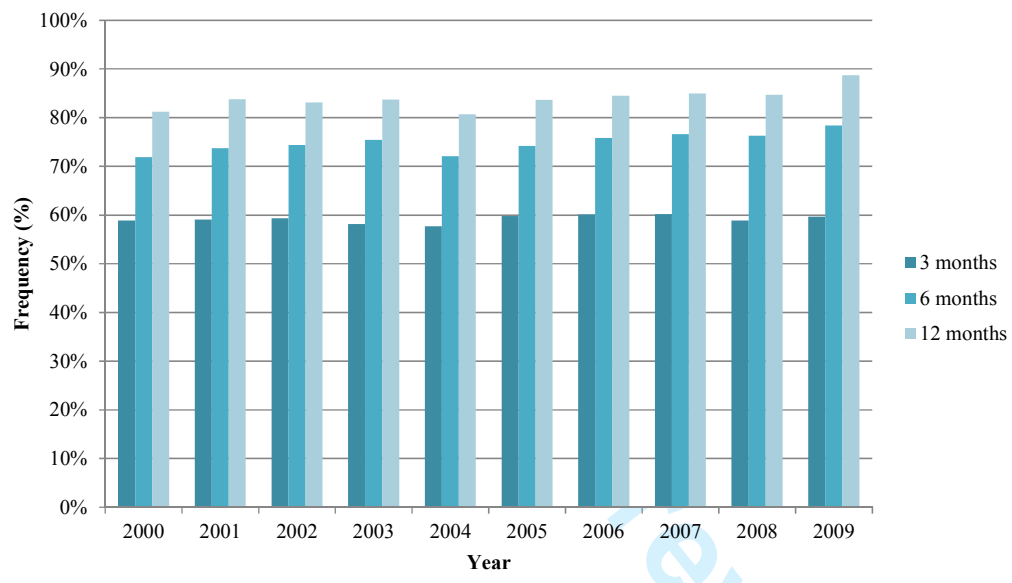

review only

Table 1: Selected cohort characteristics of 19,670 newly diagnosed RA patients that met our criteria

| Characteristic                                                                                                                                                                                                                                                                                        | Newly diagnosed RA<br>n=19,670 |
|-------------------------------------------------------------------------------------------------------------------------------------------------------------------------------------------------------------------------------------------------------------------------------------------------------|--------------------------------|
| <b>Patient Demographics</b>                                                                                                                                                                                                                                                                           |                                |
| Age at cohort entry, mean (SD)                                                                                                                                                                                                                                                                        | 53.7 (16.3)                    |
| Female, n (%)                                                                                                                                                                                                                                                                                         | 14,091 (71.1)                  |
| Rural residence, n (%)                                                                                                                                                                                                                                                                                | 3,196 (16.2)                   |
| <b>Patient Co-morbidity</b>                                                                                                                                                                                                                                                                           |                                |
| Number of Hopkins ADGs* in the 2 years prior to entry, n (%)                                                                                                                                                                                                                                          |                                |
| < 5                                                                                                                                                                                                                                                                                                   | 5,229 (26.5)                   |
| 5-9                                                                                                                                                                                                                                                                                                   | 9,790 (49.5)                   |
| 10+                                                                                                                                                                                                                                                                                                   | 4,741 (24.0)                   |
| <b>Rheumatology Access Measures</b>                                                                                                                                                                                                                                                                   |                                |
| Time (days) from first diagnosis code to first rheumatologist visit, mean (SD)                                                                                                                                                                                                                        | 76.7 (76.9)                    |
| Time (days) from first diagnosis code to first rheumatologist visit, median (IQR)                                                                                                                                                                                                                     | 50 (22-104)                    |
| Rheumatology supply per 100 000 adults†, mean (SD)                                                                                                                                                                                                                                                    | 1.5 (1.1)                      |
| Distance to closest rheumatologist                                                                                                                                                                                                                                                                    |                                |
| Kilometers, mean (SD)                                                                                                                                                                                                                                                                                 | 24.2 (69.7)                    |
| Remote (≥100 km), n (%)                                                                                                                                                                                                                                                                               | 1,047 (5.3)                    |
| <b>Primary care physician characteristics</b>                                                                                                                                                                                                                                                         |                                |
| Male, n (%)                                                                                                                                                                                                                                                                                           | 13,872 (70.2)                  |
| Years since graduation, mean (SD)                                                                                                                                                                                                                                                                     | 24.5 (10.5)                    |
| Practice type, n (%)                                                                                                                                                                                                                                                                                  |                                |
| Blended capitation models†† (FHO / FHN)                                                                                                                                                                                                                                                               | 976 (4.9)                      |
| Traditional fee-for-service and enhanced fee-for-service (FHG/Other)                                                                                                                                                                                                                                  | 18,784 (95.1)                  |
| * Ambulatory diagnostic groups                                                                                                                                                                                                                                                                        |                                |
| †in patient Local Health Integration Networks, LHINs (regional health service planning areas)                                                                                                                                                                                                         |                                |
| ††Practice types: <i>blended capitation models</i> [Family Health Networks (FHNs), Family Health Organizations (FHOs), Family Health Teams (FHTs), an interprofessional team model composed of FHNs and FHOs], <i>enhanced fee-for-service models</i> [Family Health Groups (FHGs) and other groups], |                                |

**Table 2: Descriptive characteristics for RA patients that do and do not receive rheumatology care and influence of various factors on receipt of rheumatology care within THREE months of suspected diagnosis by a primary care physician**

| Characteristic                                                                                | Seen by a rheumatologist |               | Multivariate analysis   |                          |
|-----------------------------------------------------------------------------------------------|--------------------------|---------------|-------------------------|--------------------------|
|                                                                                               | Yes<br>n=11,694          | No<br>N=8,066 | Crude OR*<br>[95% CI]** | Adjusted† OR<br>[95% CI] |
| <b>Demographics</b>                                                                           |                          |               |                         |                          |
| Age, mean (SD)                                                                                | 53.8 (15.9)              | 53.6 (16.7)   | 1.00 [1.00, 1.00]       | 1.00 [1.00, 1.00]        |
| Male sex, n (%) [REF=Female]                                                                  | 3,341 (28.6)             | 2,328 (28.9)  | 1.01 [0.95, 1.07]       | 1.04 [0.97, 1.11]        |
| Income quintile, n(%) [REF = 1 – low]                                                         | 59 (0.5)                 | 50 (0.6)      | REF                     | REF                      |
| 2                                                                                             | 2,197 (18.8)             | 1,693 (21)    | 1.10 [1.00, 1.20]       | 1.08 [0.98, 1.18]        |
| 3                                                                                             | 2,359 (20.2)             | 1,657 (20.5)  | 1.12 [1.03, 1.23]       | 1.11 [1.01, 1.22]        |
| 4                                                                                             | 2,407 (20.6)             | 1,627 (20.2)  | 1.12 [1.02, 1.23]       | 1.09 [0.99, 1.20]        |
| 5                                                                                             | 2,305 (19.7)             | 1,581 (19.6)  | 1.22 [1.11, 1.34]       | 1.18 [1.07, 1.30]        |
| Calendar Year of Cohort Entry [REF=2000]                                                      |                          |               |                         |                          |
| 2000                                                                                          | 1,110                    | 774           | REF                     | REF                      |
| 2001                                                                                          | 1,110                    | 768           | 0.99 [0.87, 1.13]       | 0.99 [0.87, 1.14]        |
| 2002                                                                                          | 1,074                    | 736           | 1.00 [0.87, 1.14]       | 1.00 [0.87, 1.15]        |
| 2003                                                                                          | 1,154                    | 830           | 0.96 [0.85, 1.10]       | 0.99 [0.87, 1.13]        |
| 2004                                                                                          | 1,187                    | 872           | 0.94 [0.83, 1.08]       | 0.99 [0.87, 1.14]        |
| 2005                                                                                          | 1,231                    | 828           | 1.05 [0.92, 1.20]       | 1.12 [0.98, 1.28]        |
| 2006                                                                                          | 1,179                    | 782           | 1.07 [0.94, 1.22]       | 1.13 [0.98, 1.29]        |
| 2007                                                                                          | 1,237                    | 818           | 1.07 [0.94, 1.23]       | 1.14 [0.99, 1.31]        |
| 2008                                                                                          | 1,268                    | 885           | 1.01 [0.89, 1.16]       | 1.10 [0.96, 1.26]        |
| 2009                                                                                          | 1,144                    | 773           | 1.03 [0.90, 1.18]       | 1.10 [0.95, 1.27]        |
| <b>Co-morbidity: Number of Hopkins ADGs in the 2 years prior to entry, n (%) (REF=&lt;=5)</b> |                          |               |                         |                          |
| < 5                                                                                           | 3,031 (25.9)             | 2,198 (27.3)  | REF                     | REF                      |
| 5-9                                                                                           | 5,802 (49.6)             | 3,988 (49.4)  | 1.04 [0.97, 1.12]       | 1.04 [0.97, 1.12]        |
| 10+                                                                                           | 2,861 (24.5)             | 1,880 (23.3)  | 1.08 [0.99, 1.18]       | 1.07 [0.98, 1.17]        |
| Hospitalization for RA prior to rheumatologist visit / end of study period, n(%)              | 71 (0.6)                 | 41 (0.5)      | 1.24 [0.84, 1.84]       | 1.34 [0.89, 2.02]        |
| <b>Geographic</b>                                                                             |                          |               |                         |                          |
| Patient Rural residence, n(%) [REF=urban]                                                     | 1,636 (14.0)             | 1,560 (19.3)  | 0.70 [0.64, 0.76]       | 0.92 [0.83, 1.01]        |
| Rheumatology supply per 100 000 adults, mean (SD)                                             | 1.6 (1.1)                | 1.4 (1.0)     | 1.16 [1.12, 1.19]       | 1.35 [1.13, 1.60]        |
| Distance to rheumatologist (km), mean (SD)                                                    | 17.8 (64.24)             | 33.6 (75.89)  | n/a                     | n/a                      |
| Remote Distance (≥100 km to rheumatologist), n(%)                                             | 312 (2.7)                | 735 (9.1)     | 0.29 [0.25, 0.34]       | 0.51 [0.41, 0.64]        |
| <b>Primary Care physician</b>                                                                 |                          |               |                         |                          |
| Male sex, n (%) (REF=Female)                                                                  | 8,069 (69.0)             | 5,803 (71.9)  | 0.83 [0.77, 0.89]       | 0.87 [0.81, 0.95]        |
| Years since graduation, mean (SD)                                                             | 24.3 (10.48)             | 24.6 (10.53)  | 1.00 [0.99, 1.00]       | 1.00 [0.99, 1.00]        |
| Practice type <sup>††</sup> , n (%) (REF=fee-for-service)                                     |                          |               |                         |                          |
| Traditional and Enhanced fee-for-service                                                      | 11,085 (94.8)            | 7,699 (95.5)  | REF                     | REF                      |
| Blended capitation models                                                                     | 609 (5.2)                | 367 (4.5)     | 1.14 [0.98, 1.32]       | 1.15 [0.99, 1.34]        |

\*OR = Odds Ratio; \*\*95% CI = 95% confidence interval  
†Adjusted for all covariates including: patient demographics, clinical factors, primary care physician characteristics, provider continuity, and geographic characteristics [including regional variation by regional health service planning areas Local Health Integration Networks (LHINs) not reported here.]  
††Practice types: *blended capitation models* [Family Health Networks (FHNs), Family Health Organizations (FHOs), Family Health Teams (FHTs), an interprofessional team model composed of FHNs and FHOs], *enhanced fee-for-service models* [Family Health Groups (FHGs) and other groups], and *solo fee-for-service practitioners* (those who did not belong to a model).



**Table 3: Influence of patient demographics, co-morbidity, geographic characteristics, and primary care physician characteristics on receipt of rheumatology care within 6 and 12 months**

| Characteristic                                                             | 6 months                |                          | 12 months            |                          |
|----------------------------------------------------------------------------|-------------------------|--------------------------|----------------------|--------------------------|
|                                                                            | Crude OR*<br>[95% CI]** | Adjusted† OR<br>[95% CI] | Crude OR<br>[95% CI] | Adjusted OR<br>[95% CI]  |
| <b>Demographics</b>                                                        |                         |                          |                      |                          |
| Age, mean (± SD)                                                           | 1.00 [1.00, 1.00]       | 1.00 [1.00, 1.00]        | 1.00 [1.00, 1.00]    | 1.00 [1.00, 1.00]        |
| Male sex [REF=Female]                                                      | 0.97 [0.90, 1.04]       | 0.98 [0.91, 1.06]        | 0.92 [0.85, 1.00]    | 0.94 [0.86, 1.02]        |
| Income quintile [REF = 1 – low]                                            | REF                     | REF                      | REF                  | REF                      |
| 2                                                                          | 1.15 [1.04, 1.27]       | 1.14 [1.03, 1.26]        | 1.07 [0.96, 1.21]    | 1.06 [0.94, 1.20]        |
| 3                                                                          | 1.22 [1.10, 1.35]       | 1.20 [1.08, 1.33]        | 1.17 [1.04, 1.32]    | <b>1.16 [1.03, 1.31]</b> |
| 4                                                                          | 1.15 [1.04, 1.27]       | 1.11 [1.00, 1.24]        | 1.15 [1.02, 1.30]    | 1.12 [0.99, 1.27]        |
| 5                                                                          | 1.30 [1.17, 1.44]       | 1.26 [1.13, 1.40]        | 1.35 [1.19, 1.53]    | <b>1.31 [1.15, 1.49]</b> |
| Calendar Year of Cohort Entry [REF=2000]                                   | REF                     | REF                      | REF                  | REF                      |
| 2001                                                                       | 1.07 [0.92, 1.23]       | 1.07 [0.92, 1.24]        | 1.13 [0.96, 1.34]    | 1.13 [0.95, 1.35]        |
| 2002                                                                       | 1.12 [0.97, 1.30]       | 1.12 [0.96, 1.31]        | 1.12 [0.95, 1.33]    | 1.14 [0.95, 1.36]        |
| 2003                                                                       | 1.19 [1.02, 1.38]       | 1.22 [1.04, 1.42]        | 1.18 [0.99, 1.40]    | 1.21 [1.01, 1.44]        |
| 2004                                                                       | 1.01 [0.87, 1.17]       | 1.04 [0.89, 1.21]        | 0.97 [0.82, 1.15]    | 1.01 [0.84, 1.20]        |
| 2005                                                                       | 1.15 [1.00, 1.34]       | 1.21 [1.04, 1.41]        | 1.22 [1.02, 1.45]    | 1.30 [1.08, 1.56]        |
| 2006                                                                       | 1.25 [1.07, 1.45]       | 1.30 [1.11, 1.52]        | 1.28 [1.07, 1.53]    | 1.33 [1.10, 1.60]        |
| 2007                                                                       | 1.29 [1.11, 1.50]       | 1.37 [1.17, 1.60]        | 1.33 [1.11, 1.59]    | 1.42 [1.18, 1.72]        |
| 2008                                                                       | 1.26 [1.09, 1.47]       | 1.35 [1.16, 1.58]        | 1.30 [1.09, 1.55]    | 1.41 [1.17, 1.70]        |
| 2009                                                                       | 1.42 [1.21, 1.66]       | 1.49 [1.26, 1.76]        | 1.83 [1.51, 2.22]    | 1.96 [1.60, 2.40]        |
| <b>Co-morbidity</b>                                                        |                         |                          |                      |                          |
| No. of Hopkins ADGs [REF=<5]                                               | REF                     | REF                      | REF                  | REF                      |
| 5-9                                                                        | 1.02 [0.94, 1.10]       | 1.03 [0.95, 1.12]        | 1.03 [0.94, 1.13]    | 1.07 [0.97, 1.18]        |
| 10+                                                                        | 1.02 [0.93, 1.12]       | 1.05 [0.95, 1.16]        | 1.04 [0.93, 1.16]    | 1.09 [0.97, 1.23]        |
| Hospitalization for RA prior to rheumatologist visit / end of study period | 0.60 [0.42, 0.85]       | 0.63 [0.44, 0.91]        | 0.51 [0.36, 0.71]    | 0.54 [0.38, 0.76]        |
| <b>Geographic</b>                                                          |                         |                          |                      |                          |
| Patient rural residence [REF=urban]                                        | 0.74 [0.68, 0.81]       | 1.00 [0.89, 1.11]        | 0.80 [0.72, 0.89]    | 1.09 [0.96, 1.24]        |
| Rheumatology supply per 100 000 adults                                     | 1.15 [1.11, 1.20]       | 1.19 [0.97, 1.45]        | 1.16 [1.11, 1.22]    | 1.25 [0.98, 1.61]        |
| Remote Distance (≥100 km to rheumatologist)                                | 0.28 [0.24, 0.33]       | 0.46 [0.36, 0.59]        | 0.26 [0.22, 0.31]    | 0.33 [0.26, 0.43]        |
| <b>Primary Care physician</b>                                              |                         |                          |                      |                          |
| Male sex [REF=Female]                                                      | 0.81 [0.74, 0.89]       | 0.89 [0.81, 0.97]        | 0.81 [0.73, 0.90]    | 0.91 [0.81, 1.01]        |
| Years since graduation                                                     | 1.00 [0.99, 1.00]       | 0.99 [0.99, 1.00]        | 1.00 [0.99, 1.00]    | 0.99 [0.99, 1.00]        |
| Practice type <sup>††</sup> [REF=fee-for-service]                          |                         |                          |                      |                          |
| Capitation model                                                           | 1.22 [1.01, 1.47]       | 1.13 [0.93, 1.36]        | 1.22 [0.99, 1.51]    | 1.09 [0.87, 1.35]        |

Formatted: Position: Horizontal: Left, Relative to: Column, Vertical: 0", Relative to: Paragraph, Horizontal: 0.13", Wrap Around

Formatted: Position: Horizontal: Left, Relative to: Column, Vertical: 0", Relative to: Paragraph, Horizontal: 0.13", Wrap Around

Formatted: Position: Horizontal: Left, Relative to: Column, Vertical: 0", Relative to: Paragraph, Horizontal: 0.13", Wrap Around

Formatted: Position: Horizontal: Left, Relative to: Column, Vertical: 0", Relative to: Paragraph, Horizontal: 0.13", Wrap Around

Formatted: Position: Horizontal: Left, Relative to: Column, Vertical: 0", Relative to: Paragraph, Horizontal: 0.13", Wrap Around

Formatted: Position: Horizontal: Left, Relative to: Column, Vertical: 0", Relative to: Paragraph, Horizontal: 0.13", Wrap Around

Formatted: Position: Horizontal: Left, Relative to: Column, Vertical: 0", Relative to: Paragraph, Horizontal: 0.13", Wrap Around

## REFERENCES

1. Pincus T. Rheumatoid arthritis: a medical emergency? *Scand J Rheumatol Suppl* 1994;**100**:21-30
2. Moreland LW, Bridges SL, Jr. Early rheumatoid arthritis: a medical emergency? *Am J Med* 2001;**111**(6):498-500 doi: S0002-9343(01)00973-1 [pii][published Online First: Epub Date].
3. Emery P, Breedveld FC, Dougados M, et al. Early referral recommendation for newly diagnosed rheumatoid arthritis: evidence based development of a clinical guide. *Ann Rheum Dis* 2002;**61**(4):290-7
4. Combe B, Landewe R, Lukas C, et al. EULAR recommendations for the management of early arthritis: report of a task force of the European Standing Committee for International Clinical Studies Including Therapeutics (ESCISIT). *Ann Rheum Dis* 2007;**66**(1):34-45 doi: ard.2005.044354 [pii]
- 10.1136/ard.2005.044354[published Online First: Epub Date].
5. Bykerk V. Canadian Consensus Statement on Early Optimal Therapy in Early Rheumatoid Arthritis. *The Journal of the Canadian Rheumatology Association* 2004
6. Widdifield J, Bernatsky S, Paterson JM, et al. Quality care in seniors with new-onset rheumatoid arthritis: a Canadian perspective. *Arthritis Care Res (Hoboken)* 2011;**63**(1):53-7 doi: 10.1002/acr.20304[published Online First: Epub Date].
7. Nell VP, Machold KP, Eberl G, et al. Benefit of very early referral and very early therapy with disease-modifying anti-rheumatic drugs in patients with early rheumatoid arthritis. *Rheumatology (Oxford)* 2004;**43**(7):906-14 doi: 10.1093/rheumatology/keh199
- keh199 [pii][published Online First: Epub Date].
8. Kyburz D, Gabay C, Michel BA, et al. The long-term impact of early treatment of rheumatoid arthritis on radiographic progression: a population-based cohort study. *Rheumatology (Oxford)* 2011;**50**(6):1106-10 doi: keq424 [pii]
- 10.1093/rheumatology/keq424[published Online First: Epub Date].
9. Feldman DE, Bernatsky S, Houde M, et al. Early consultation with a rheumatologist for RA: does it reduce subsequent use of orthopaedic surgery? *Rheumatology (Oxford)* 2012 doi: kes231 [pii]
- 10.1093/rheumatology/kes231[published Online First: Epub Date].
10. van Nies JA, Krabben A, Schoones JW, et al. What is the evidence for the presence of a therapeutic window of opportunity in rheumatoid arthritis? A systematic literature review. *Ann Rheum Dis* 2013 doi: annrheumdis-2012-203130 [pii]
- 10.1136/annrheumdis-2012-203130[published Online First: Epub Date].
11. Mierau M, Schoels M, Gonda G, et al. Assessing remission in clinical practice. *Rheumatology (Oxford)* 2007;**46**:975-9
12. Emery P, Breedveld F, Hall S, et al. Comparison of methotrexate monotherapy with a combination of methotrexate and etanercept in active, early, moderate to severe rheumatoid arthritis (COMET): a randomised, double-blind, parallel treatment trial. *Lancet* 2008;**372**:375-82.
13. Emery P, Salmon M. Early rheumatoid arthritis: time to aim for remission? *Ann Rheum Dis* 1995;**54**:944-7
14. Sokka T, Hetland M, Mäkinen H, et al. Remission and rheumatoid arthritis: Data on patients receiving usual care in twenty-four countries. *Arthritis Rheum* 2008;**58**:2642-51
15. Boers M. Understanding the window of opportunity concept in early rheumatoid arthritis. *Arthritis Rheum* 2003;**48**(7):1771-4 doi: 10.1002/art.11156[published Online First: Epub Date].

16. Li LC, Badley EM, MacKay C, et al. An evidence-informed, integrated framework for rheumatoid arthritis care. *Arthritis Rheum* 2008;**59**(8):1171-83 doi: 10.1002/art.23931[published Online First: Epub Date]].
17. Kralj B, Kantarevic J. Primary Care in Ontario: reforms, investments and achievements. Ontario Medical Review Available online: <https://www.oma.org/Resources/Documents/PrimaryCareFeaturepdf> 2012
18. Widdifield J, Paterson JM, Bernatsky S, et al. The Rising Burden of Rheumatoid Arthritis Surpasses Rheumatology Supply in Ontario. *Canadian Journal of Public Health* 2013;**[in press]**
19. Tepper J, Schultz S, Rothwell D, et al. Physician services in rural and Northern Ontario. . ICES investigative report. Toronto (ON): Institute for Clinical Evaluative Sciences, 2005.
20. Widdifield J, Bombardier C, Bernatsky S, et al. Accuracy of Canadian Health Administrative Databases for identifying Patients with Rheumatoid Arthritis: A validation study using the Medical Records of Primary Care Physicians. 2012 ACR Annual Scientific Meeting [Abstract #926]. *Arthritis Care and Research* 2012
21. Widdifield J, Bernatsky S, Paterson JM, et al. Accuracy of Canadian health administrative databases in identifying patients with rheumatoid arthritis: a validation study using the medical records of rheumatologists. *Arthritis Care Res (Hoboken)* 2013;**65**(10):1582-91 doi: 10.1002/acr.22031[published Online First: Epub Date]].
22. Chan B, Schultz S. Supply and utilization of general practitioner and family physician services in Ontario. Toronto, ON: Institute for Clinical Evaluative Sciences, 2005.
23. Improving health care data in Ontario. ICES Investigative Report. Toronto: Institute for Clinical Evaluative Sciences, 2005.
24. The Johns Hopkins Adjusted Clinical Group (ACG) Case-Mix System. Available at: <http://acg.jhsph.edu>. Secondary The Johns Hopkins Adjusted Clinical Group (ACG) Case-Mix System. Available at: <http://acg.jhsph.edu>.
25. Starfield B. Primary Care: Balancing Health Needs, Services and Technology. New York: Oxford University Press, 1998:35-54.
26. Ministry of Health and Long-Term Care M. Local Health Integration Networks. Secondary Local Health Integration Networks 2006. <http://www.lhins.on.ca/>.
27. Ministry of Health and Long-Term Care M. Health Force Ontario: Family Practice Models. Secondary Health Force Ontario: Family Practice Models 2013. [http://www.healthforceontario.ca/en/Home/Physicians/Training\\_%7C\\_Practising\\_in\\_Ontario/Physician\\_Roles/Family\\_Practice\\_Models](http://www.healthforceontario.ca/en/Home/Physicians/Training_%7C_Practising_in_Ontario/Physician_Roles/Family_Practice_Models).
28. Glazier R, Zagorski B, Rayner J. Comparison of Primary Care Models in Ontario by Demographics, Case Mix and Emergency Department Use, 2008/09 to 2009/10. ICES Investigative Report Toronto: Institute for Clinical Evaluative Sciences, 2012.
29. Lacaille D, Anis A, Guh D, et al. Gaps in care for rheumatoid arthritis: a population study. *Arthritis Rheum* 2005;**53**(2):241-8
30. Feldman DE, Bernatsky S, Haggerty J, et al. Delay in consultation with specialists for persons with suspected new-onset rheumatoid arthritis: a population-based study. *Arthritis Rheum* 2007;**57**(8):1419-25 doi: 10.1002/art.23086[published Online First: Epub Date]].
31. van der Linden MP, le Cessie S, Raza K, et al. Long-term impact of delay in assessment of patients with early arthritis. *Arthritis Rheum* 2010;**62**(12):3537-46 doi: 10.1002/art.27692[published Online First: Epub Date]].
32. Visser H, le Cessie S, Vos K, et al. How to diagnose rheumatoid arthritis early: a prediction model for persistent (erosive) arthritis. *Arthritis Rheum* 2002;**46**(2):357-65 doi: 10.1002/art.10117 [pii][published Online First: Epub Date]].

- 1  
2  
3  
4  
5  
6  
7  
8  
9  
10  
11  
12  
13  
14  
15  
16  
17  
18  
19  
20  
21  
22  
23  
24  
25  
26  
27  
28  
29  
30  
31  
32  
33  
34  
35  
36  
37  
38  
39  
40  
41  
42  
43  
44  
45  
46  
47  
48  
49  
50  
51  
52  
53  
54  
55  
56  
57  
58  
59  
60
33. Puolakka K, Kautiainen H, Mottonen T, et al. Impact of initial aggressive drug treatment with a combination of disease-modifying antirheumatic drugs on the development of work disability in early rheumatoid arthritis: a five-year randomized followup trial. *Arthritis Rheum* 2004;**50**(1):55-62 doi: 10.1002/art.11436[published Online First: Epub Date].
34. Bombardier C, Hawker G, Mosher D. The Impact of Arthritis in Canada: Today and Over the Next 30 Years. Arthritis Alliance of Canada, 2011.
35. Gabriel S, Wagner J, Zinsmeister A, et al. Is rheumatoid arthritis care more costly when provided by rheumatologists compared with generalists? *Arthritis Rheum* 2001;**44**(7):1504-14
36. Widdifield J, Paterson JM, Bernatsky S, et al. Epidemiology of Rheumatoid Arthritis in Ontario, Canada. *Arthritis & Rheumatism* 2013;[in press]
37. Glazier R, Gozdyra P, Yeritsyan N. Geographic Access to Primary Care and Hospital Services for Rural and Northern Communities. Toronto, Ontario: Institute for Clinical Evaluative Sciences, 2011.
38. Hawker G, Badley E, Jaglal S, et al. Project for an Ontario Women's Health Evidence-Based Report: Musculoskeletal Conditions. In: Bierman A, ed. Toronto, 2010.
39. Badley E, Veinot P, Ansari H, et al. Arthritis Community Research and Evaluation Unit 2007 survey of rheumatologists in Ontario. <http://www.acreu.ca/pdf/pub5/08-03.pdf>. 2008
40. Meeuwesen L, Schapp C, Van der Staak C. Verbal analysis of doctor-patient communication. *Soc Sci Med* 1991;**32**(1143)
41. Bensing JM, van den Brink-Muinen A, de Bakker DH. Gender differences in practice style: a Dutch study of general practitioners. *Med Care* 1993;**31**(3):219-29
42. Bertakis K, Helms L, Callahan E, et al. The influence of gender on physician practice style. *Med Care* 1995;**33**:407-16
43. Hall JA, Blanch-Hartigan D, Roter DL. Patients' satisfaction with male versus female physicians: a meta-analysis. *Med Care* 2011;**49**(7):611-7 doi: 10.1097/MLR.0b013e318213c03f[published Online First: Epub Date].
44. Jamal S, Alibhai SM, Badley EM, et al. Time to treatment for new patients with rheumatoid arthritis in a major metropolitan city. *J Rheumatol* 2011;**38**(7):1282-8 doi: jrheum.101315 [pii] 10.3899/jrheum.101315[published Online First: Epub Date].

1  
2  
3  
4  
5  
6  
7  
8  
9  
10  
11  
12  
13  
14  
15  
16  
17  
18  
19  
20  
21  
22  
23  
24  
25  
26  
27  
28  
29  
30  
31  
32  
33  
34  
35  
36  
37  
38  
39  
40  
41  
42  
43  
44  
45  
46  
47  
48  
49  
50  
51  
52  
53  
54  
55  
56  
57  
58  
59  
60

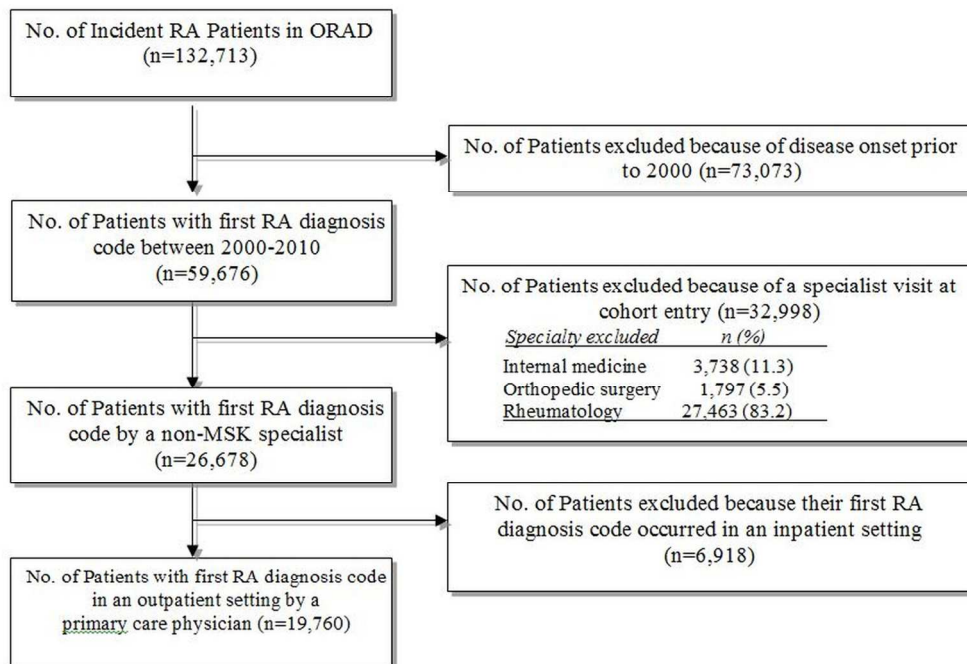

133x90mm (300 x 300 DPI)

Review only

1  
2  
3  
4  
5  
6  
7  
8  
9  
10  
11  
12  
13  
14  
15  
16  
17  
18  
19  
20  
21  
22  
23  
24  
25  
26  
27  
28  
29  
30  
31  
32  
33  
34  
35  
36  
37  
38  
39  
40  
41  
42  
43  
44  
45  
46  
47  
48  
49  
50  
51  
52  
53  
54  
55  
56  
57  
58  
59  
60

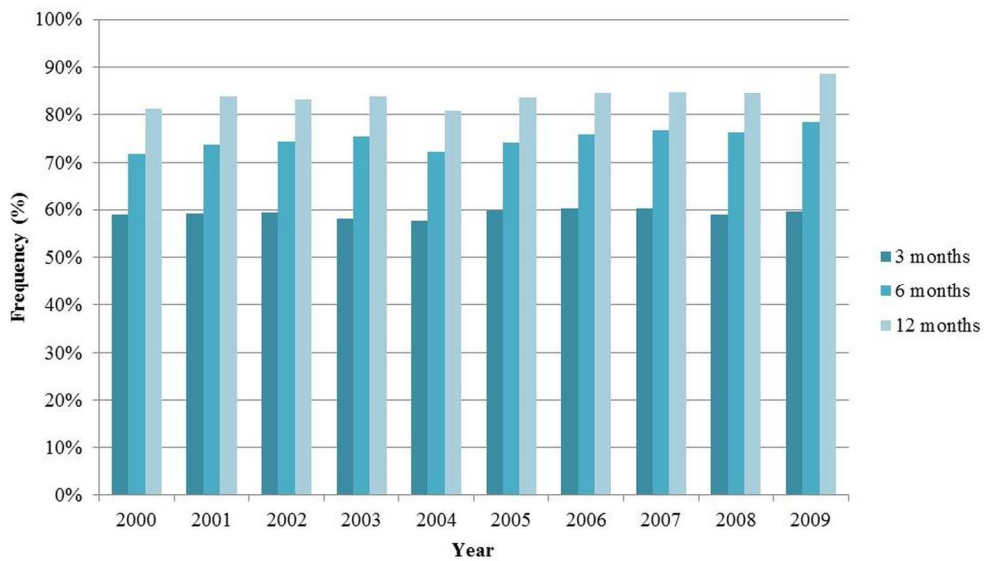

156x90mm (300 x 300 DPI)

review only

STROBE Statement—Checklist of items that should be included in reports of *cohort studies*

|                              | Item No | Recommendation                                                                                                                                                                                                |
|------------------------------|---------|---------------------------------------------------------------------------------------------------------------------------------------------------------------------------------------------------------------|
| Title and abstract           | 1       | ✓(a) Indicate the study's design with a commonly used term in the title or the abstract                                                                                                                       |
|                              |         | ✓(b) Provide in the abstract an informative and balanced summary of what was done and what was found                                                                                                          |
| <b>Introduction</b>          |         |                                                                                                                                                                                                               |
| Background/rationale         | 2       | ✓ Explain the scientific background and rationale for the investigation being reported                                                                                                                        |
| Objectives                   | 3       | ✓ State specific objectives, including any prespecified hypotheses                                                                                                                                            |
| <b>Methods</b>               |         |                                                                                                                                                                                                               |
| Study design                 | 4       | ✓ Present key elements of study design early in the paper                                                                                                                                                     |
| Setting                      | 5       | ✓ Describe the setting, locations, and relevant dates, including periods of recruitment, exposure, follow-up, and data collection                                                                             |
| Participants                 | 6       | ✓(a) Give the eligibility criteria, and the sources and methods of selection of participants. Describe methods of follow-up                                                                                   |
|                              |         | (b) For matched studies, give matching criteria and number of exposed and unexposed                                                                                                                           |
| Variables                    | 7       | ✓ Clearly define all outcomes, exposures, predictors, potential confounders, and effect modifiers. Give diagnostic criteria, if applicable                                                                    |
| Data sources/<br>measurement | 8*      | ✓ For each variable of interest, give sources of data and details of methods of assessment (measurement). Describe comparability of assessment methods if there is more than one group                        |
| Bias                         | 9       | ✓ Describe any efforts to address potential sources of bias                                                                                                                                                   |
| Study size                   | 10      | Explain how the study size was arrived at <i>n/a – population-based study</i>                                                                                                                                 |
| Quantitative variables       | 11      | ✓ Explain how quantitative variables were handled in the analyses. If applicable, describe which groupings were chosen and why                                                                                |
| Statistical methods          | 12      | ✓(a) Describe all statistical methods, including those used to control for confounding                                                                                                                        |
|                              |         | ✓(b) Describe any methods used to examine subgroups and interactions                                                                                                                                          |
|                              |         | (c) Explain how missing data were addressed                                                                                                                                                                   |
|                              |         | ✓(d) If applicable, explain how loss to follow-up was addressed                                                                                                                                               |
|                              |         | ✓(e) Describe any sensitivity analyses                                                                                                                                                                        |
| <b>Results</b>               |         |                                                                                                                                                                                                               |
| Participants                 | 13*     | ✓(a) Report numbers of individuals at each stage of study—eg numbers potentially eligible, examined for eligibility, confirmed eligible, included in the study, completing follow-up, and analysed            |
|                              |         | (b) Give reasons for non-participation at each stage <i>n/a</i>                                                                                                                                               |
|                              |         | ✓(c) Consider use of a flow diagram                                                                                                                                                                           |
| Descriptive data             | 14*     | ✓(a) Give characteristics of study participants (eg demographic, clinical, social) and information on exposures and potential confounders                                                                     |
|                              |         | (b) Indicate number of participants with missing data for each variable of interest                                                                                                                           |
|                              |         | (c) Summarise follow-up time (eg, average and total amount)                                                                                                                                                   |
| Outcome data                 | 15*     | ✓ Report numbers of outcome events or summary measures over time                                                                                                                                              |
| Main results                 | 16      | ✓(a) Give unadjusted estimates and, if applicable, confounder-adjusted estimates and their precision (eg, 95% confidence interval). Make clear which confounders were adjusted for and why they were included |



|                          |    |                                                                                                                                                                             |
|--------------------------|----|-----------------------------------------------------------------------------------------------------------------------------------------------------------------------------|
|                          |    | ✓(b) Report category boundaries when continuous variables were categorized                                                                                                  |
|                          |    | (c) If relevant, consider translating estimates of relative risk into absolute risk for a meaningful time period                                                            |
| Other analyses           | 17 | ✓Report other analyses done—eg analyses of subgroups and interactions, and sensitivity analyses                                                                             |
| <b>Discussion</b>        |    |                                                                                                                                                                             |
| Key results              | 18 | ✓Summarise key results with reference to study objectives                                                                                                                   |
| Limitations              | 19 | ✓Discuss limitations of the study, taking into account sources of potential bias or imprecision. Discuss both direction and magnitude of any potential bias                 |
| Interpretation           | 20 | ✓Give a cautious overall interpretation of results considering objectives, limitations, multiplicity of analyses, results from similar studies, and other relevant evidence |
| Generalisability         | 21 | ✓Discuss the generalisability (external validity) of the study results                                                                                                      |
| <b>Other information</b> |    |                                                                                                                                                                             |
| Funding                  | 22 | ✓Give the source of funding and the role of the funders for the present study and, if applicable, for the original study on which the present article is based              |

\*Give information separately for exposed and unexposed groups.

**Note:** An Explanation and Elaboration article discusses each checklist item and gives methodological background and published examples of transparent reporting. The STROBE checklist is best used in conjunction with this article (freely available on the Web sites of PLoS Medicine at <http://www.plosmedicine.org/>, Annals of Internal Medicine at <http://www.annals.org/>, and Epidemiology at <http://www.epidem.com/>). Information on the STROBE Initiative is available at <http://www.strobe-statement.org>.
